# Supplementary material for: Spatially resolved, high-dimensional transcriptomics sorts out the evolution of biphasic malignant pleural mesothelioma: new paradigms for immunotherapy
Source: PubMed Central journal article supplement (PMC10351128; doi:10.1186/s12943-023-01816-9), 2023-07-17
Supplement: 12943_2023_1816_MOESM1_ESM.pdf [file 12943_2023_1816_MOESM1_ESM.pdf]

# Supplementary FIGURE1

A

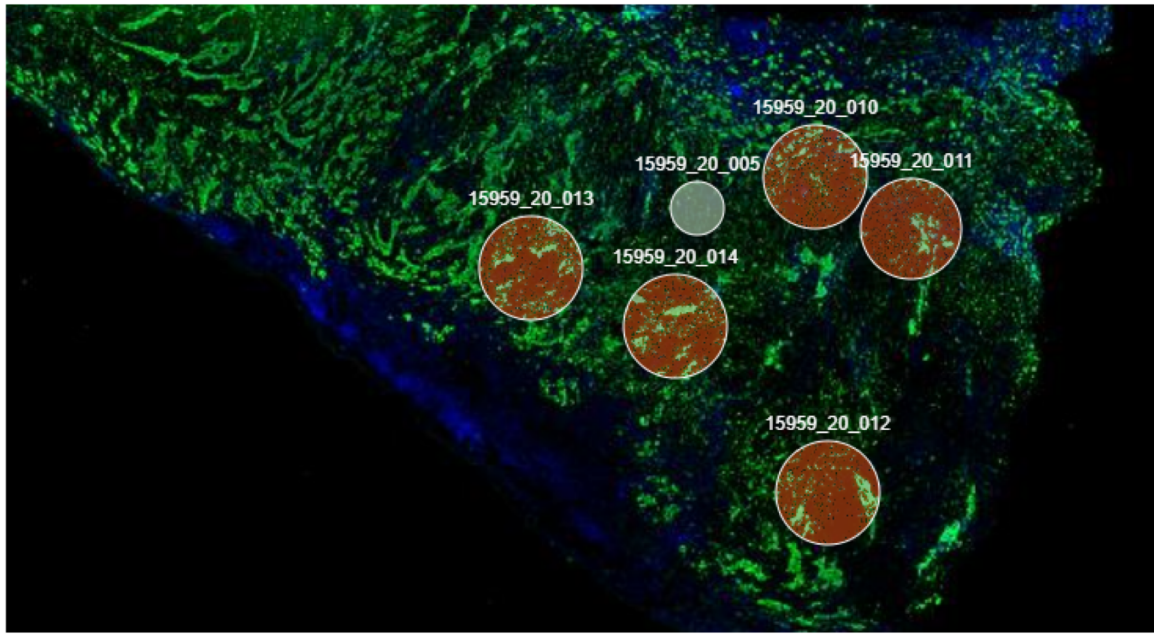

B

spearman correlation of samples on log2\_norm\_counts\_all

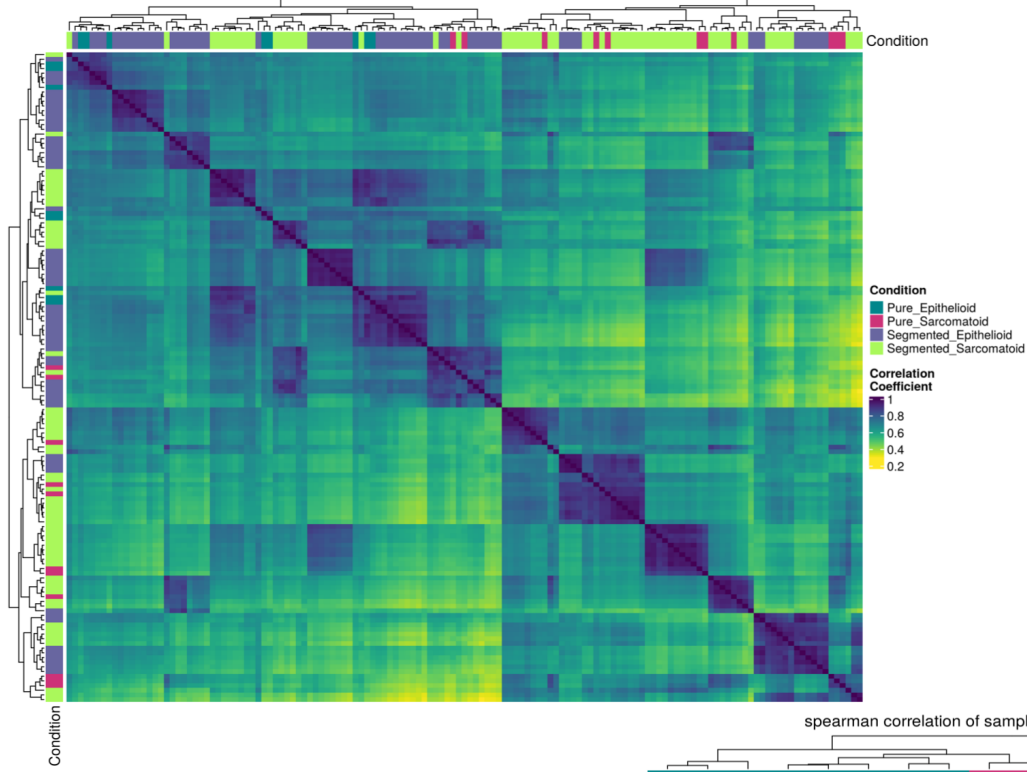

spearman correlation of samples on log2\_norm\_counts\_pure

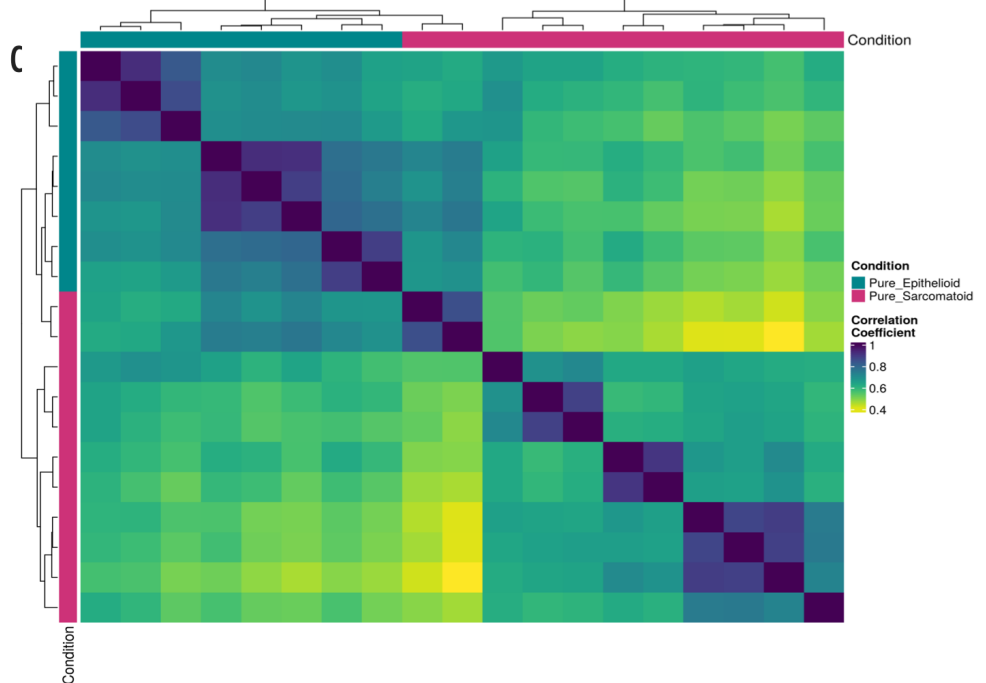

SUPPLEMENTARY FIGURE 2

A

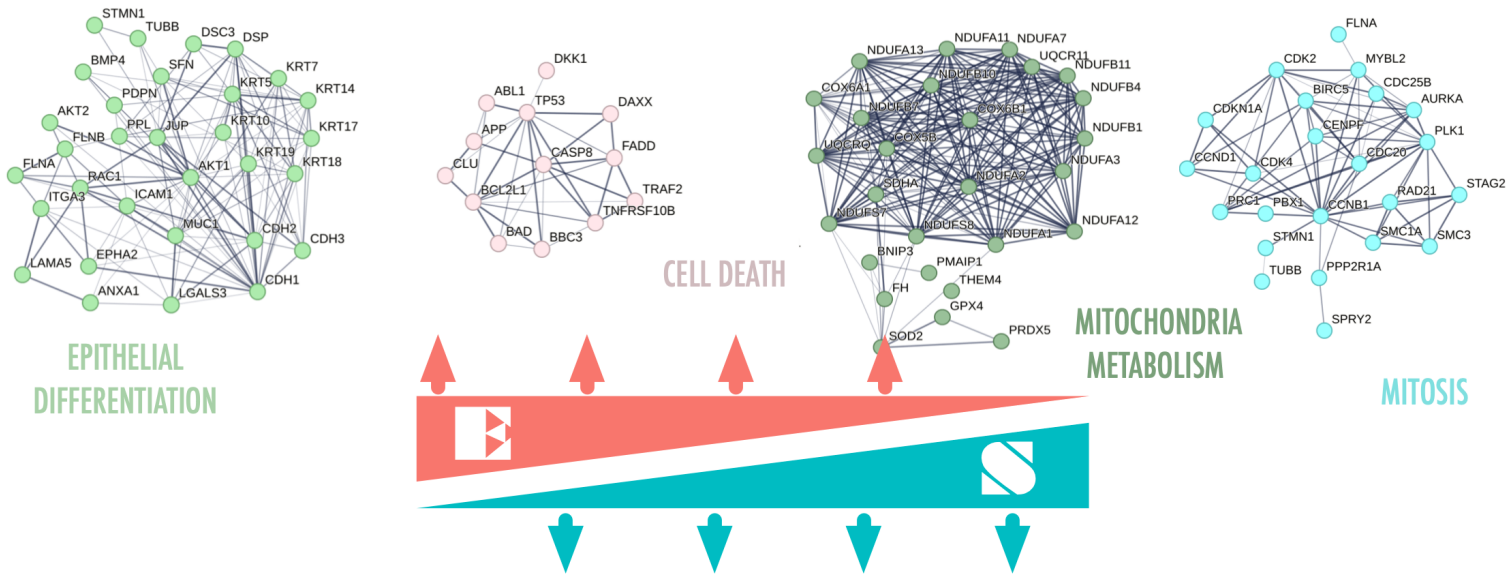

B

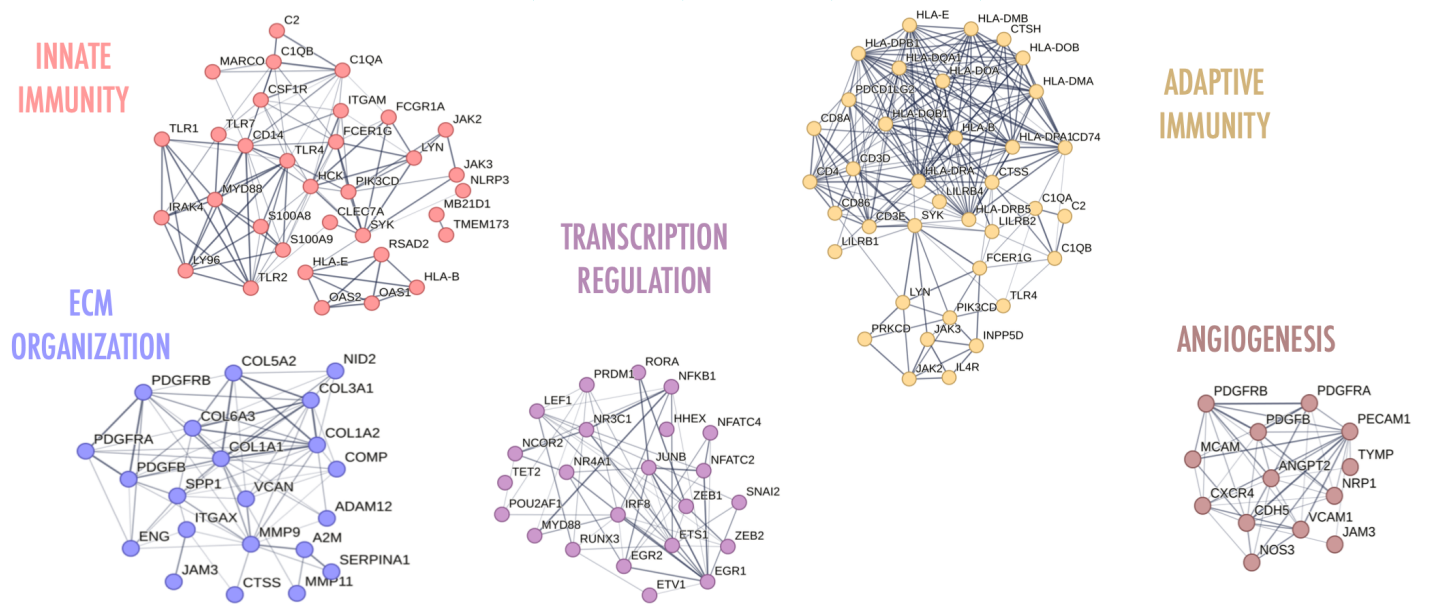

C

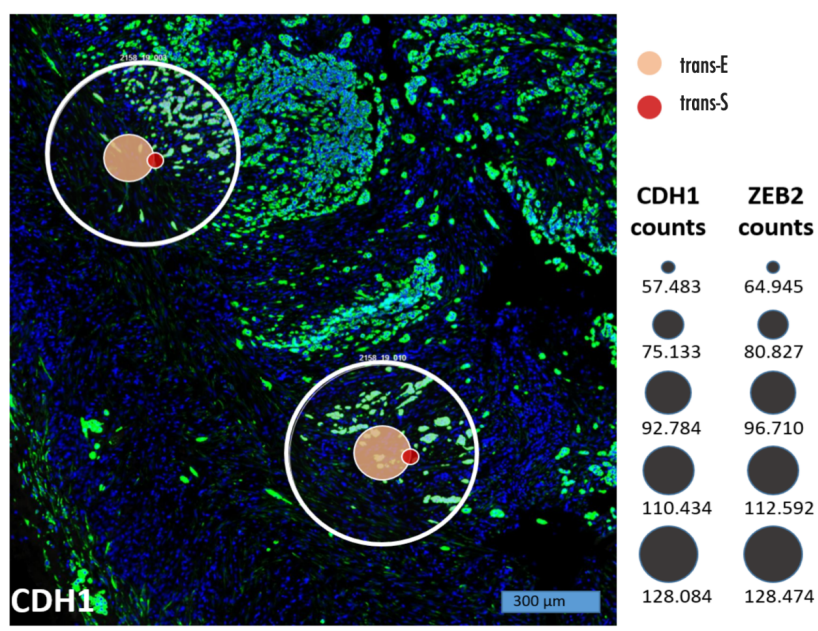

D

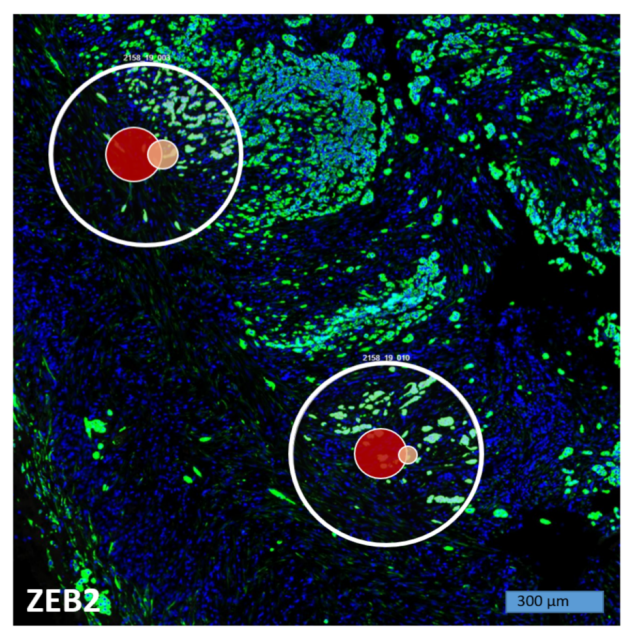

pS-AOIs vs pE-AOIs

A

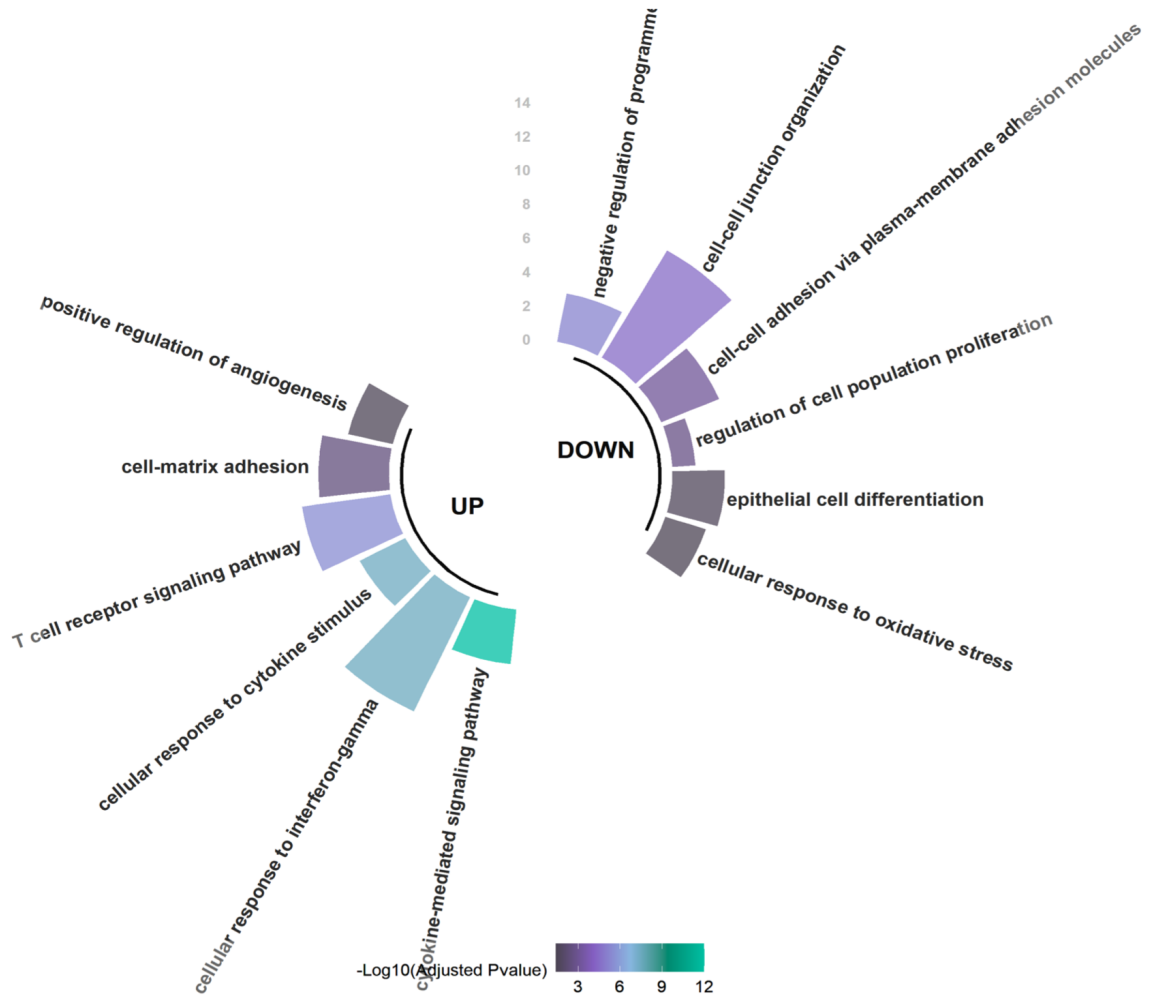

tS-AOIs vs tE-AOIs

B

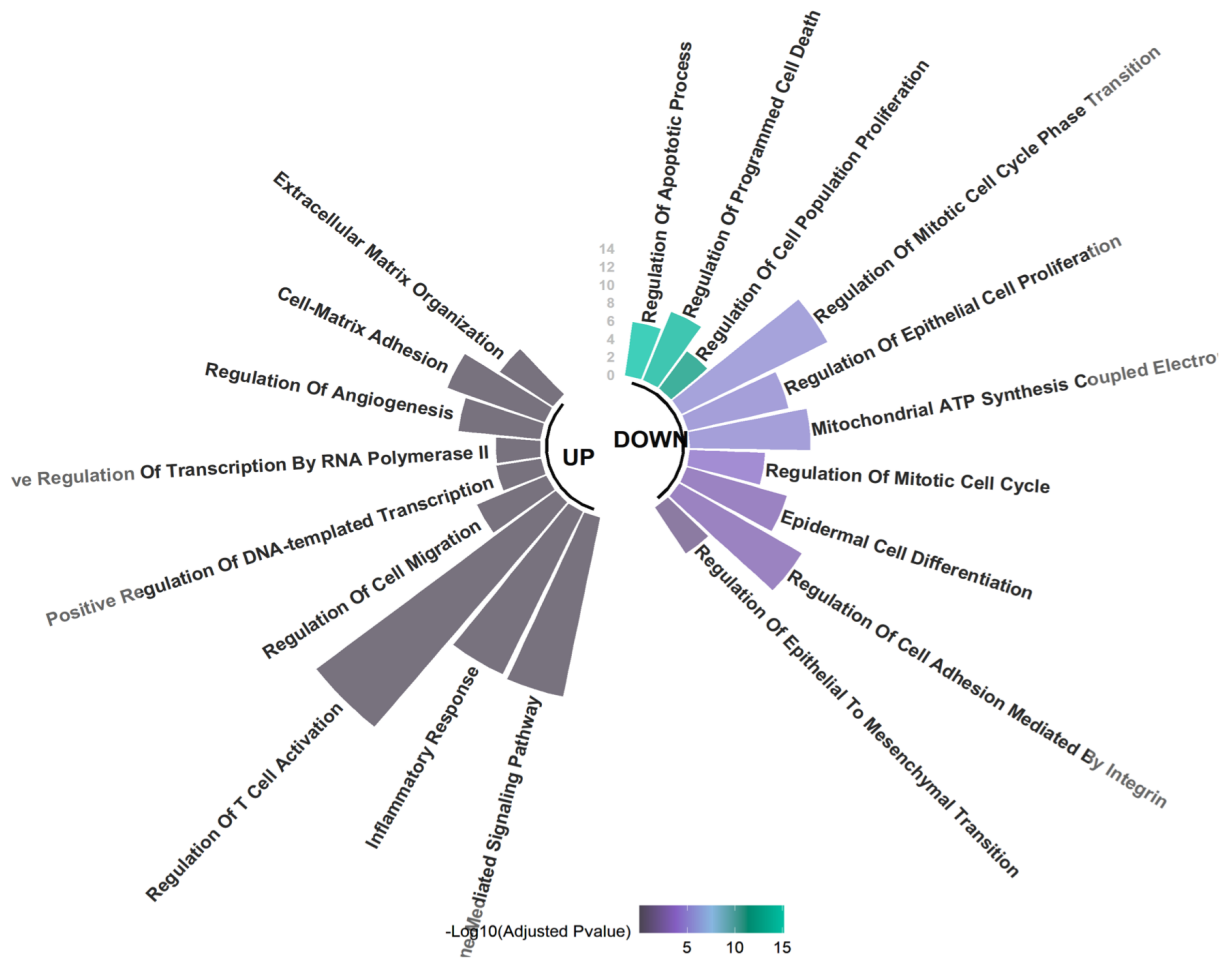

Supplementary Figure 4

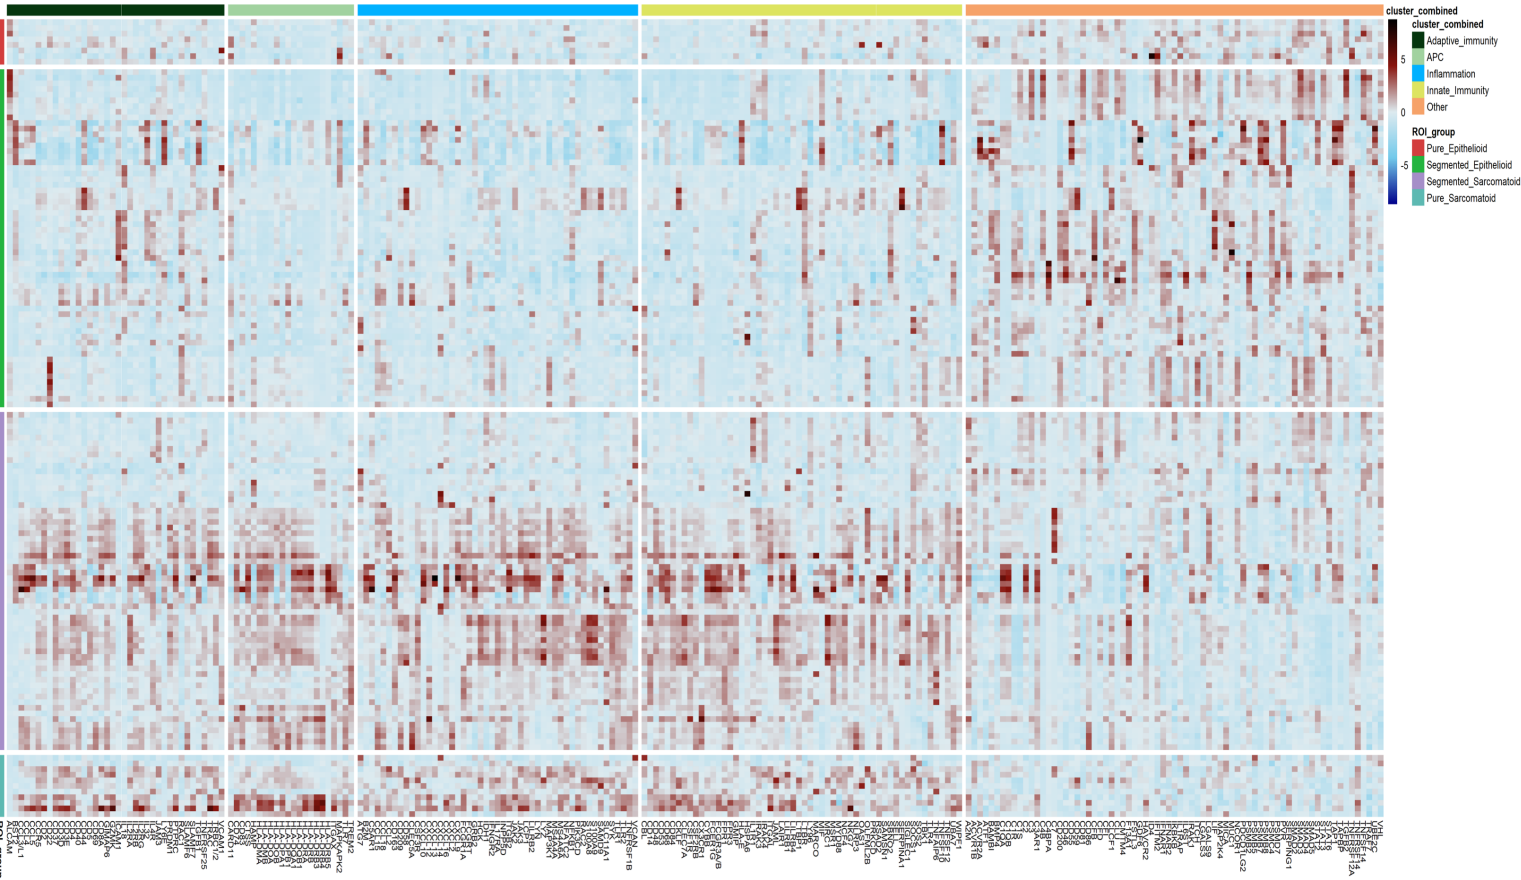

# Supplementary Figure 5

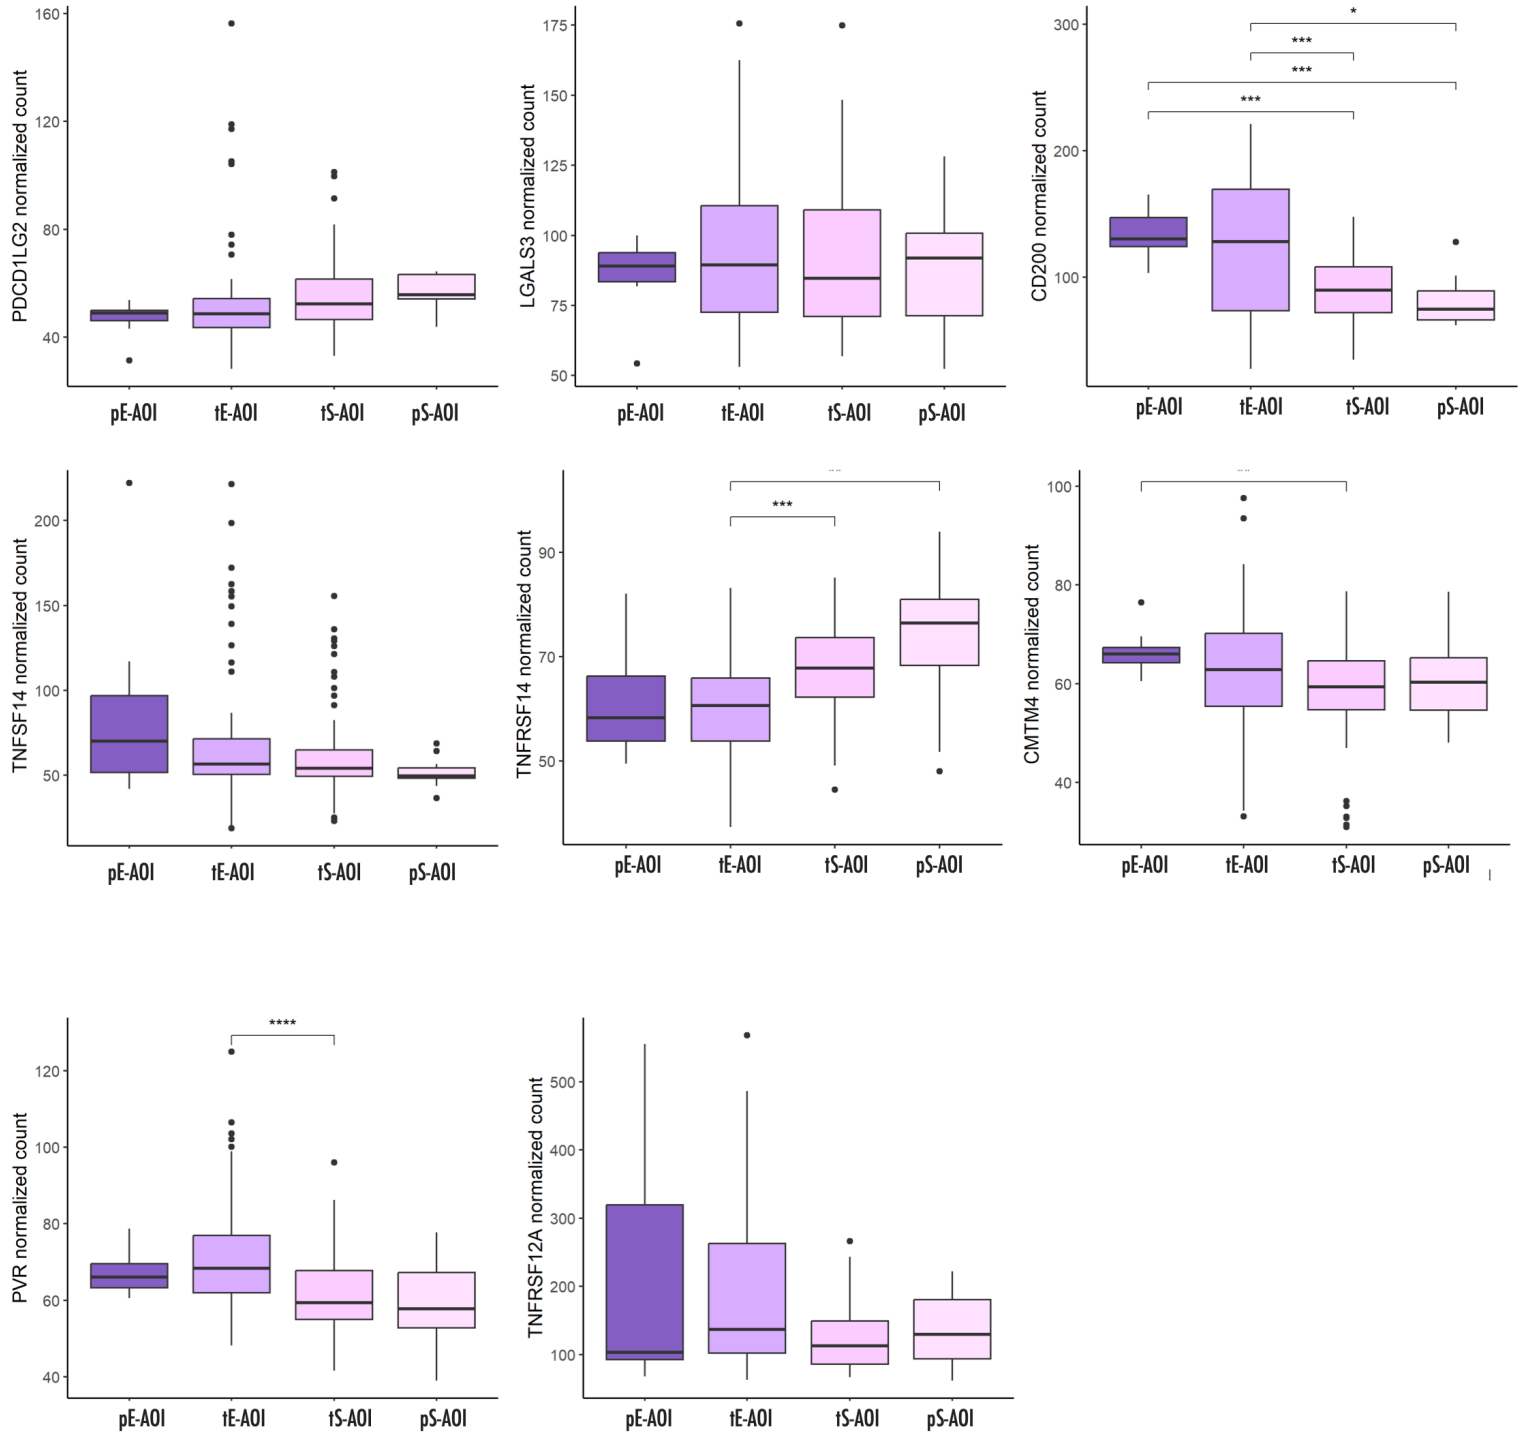

# Supplementary Figure 6

● pE-AOIs   
 ● tE-AOIs   
 ● tS-AOIs   
 ● tS-AOIs

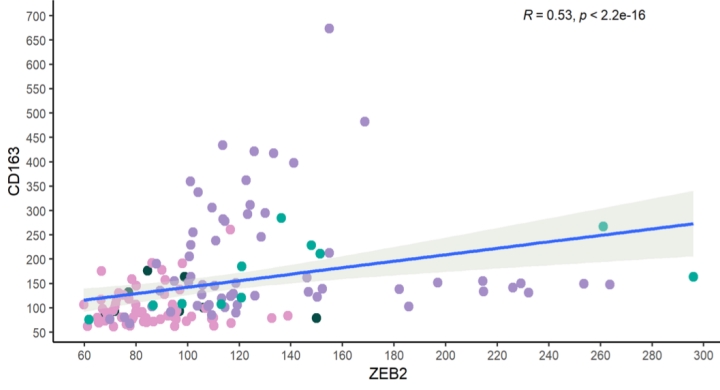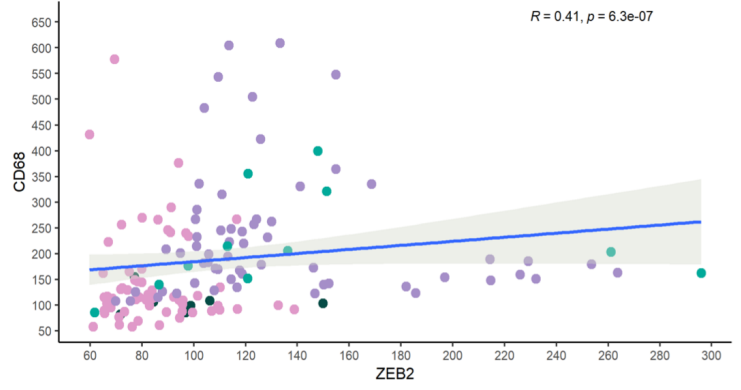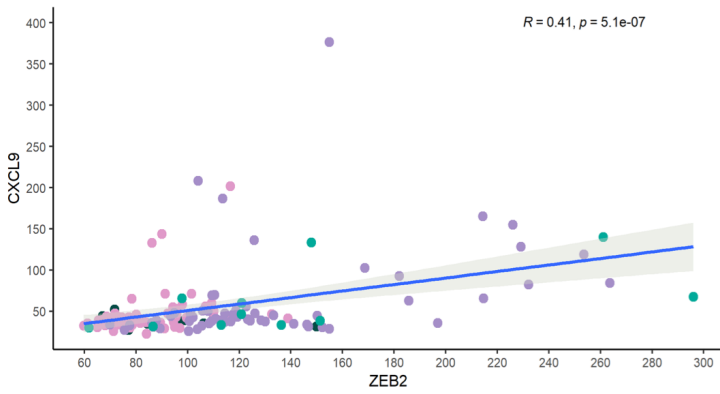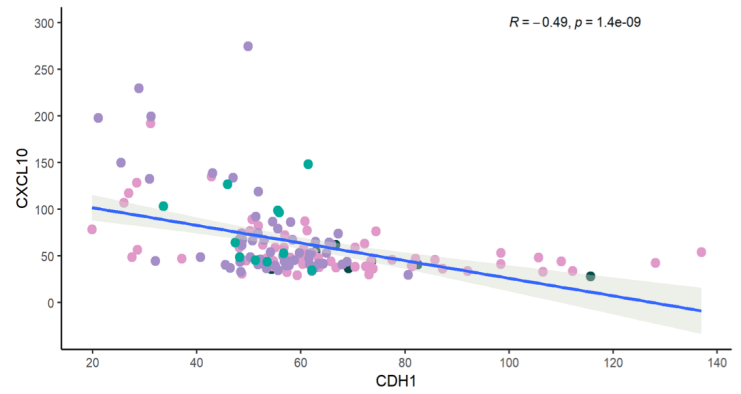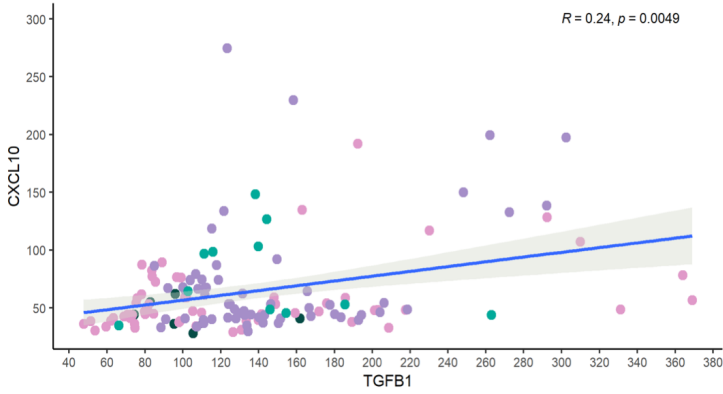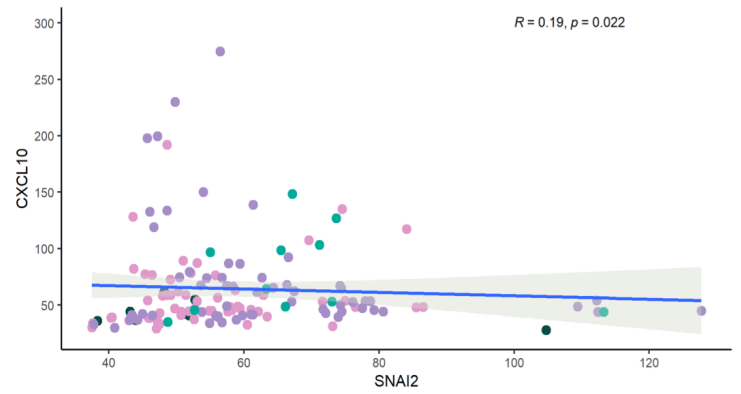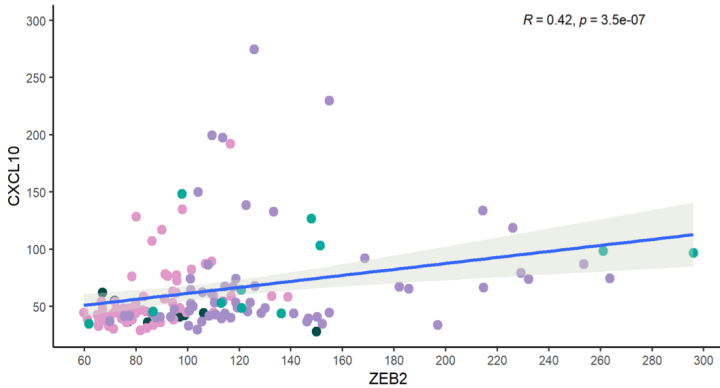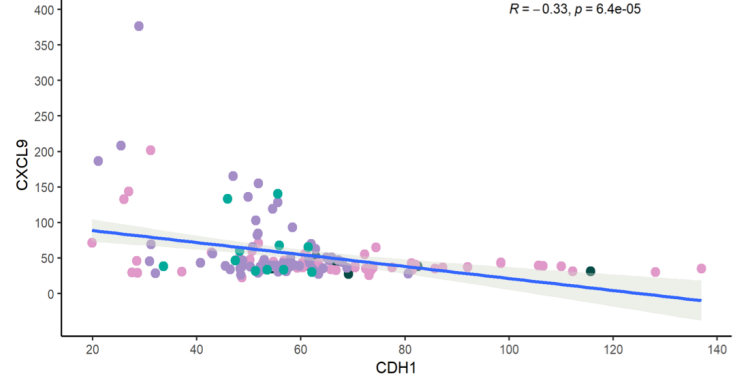

LGALS9

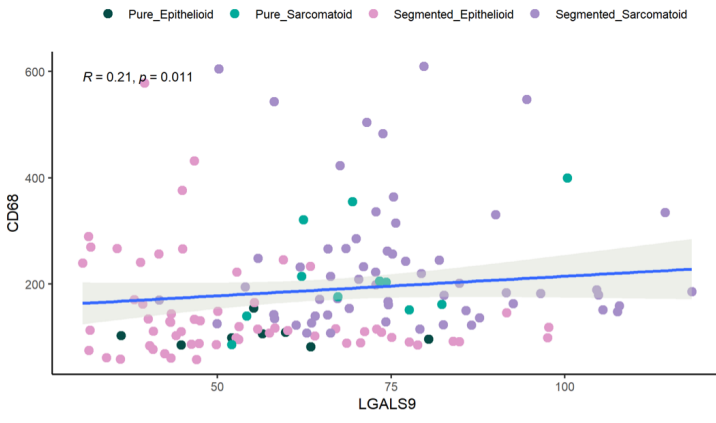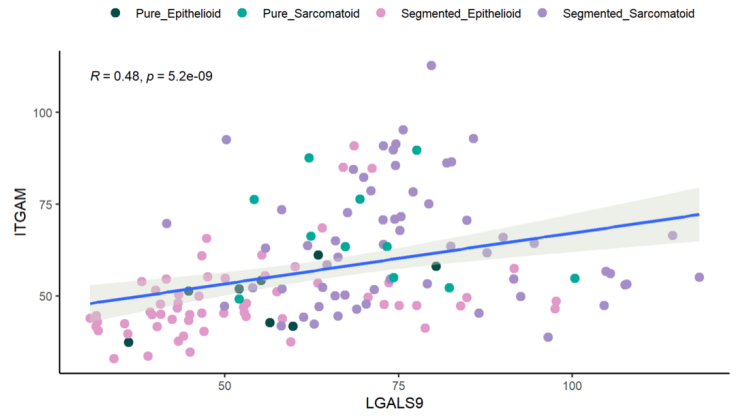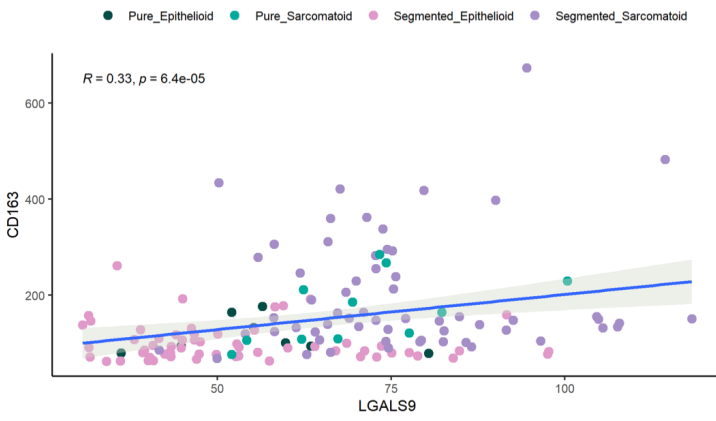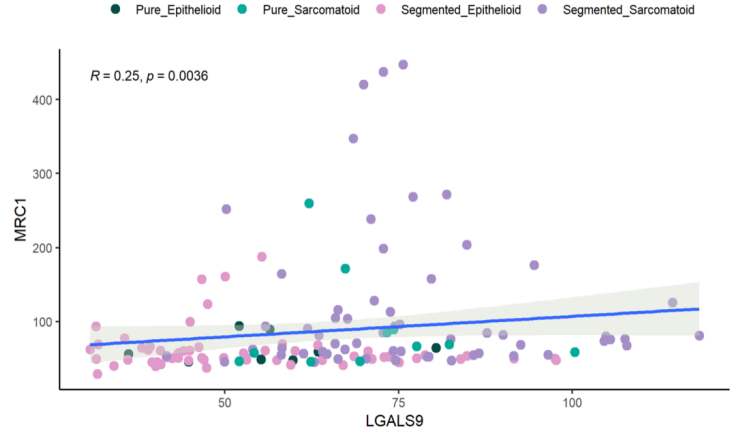

CD86

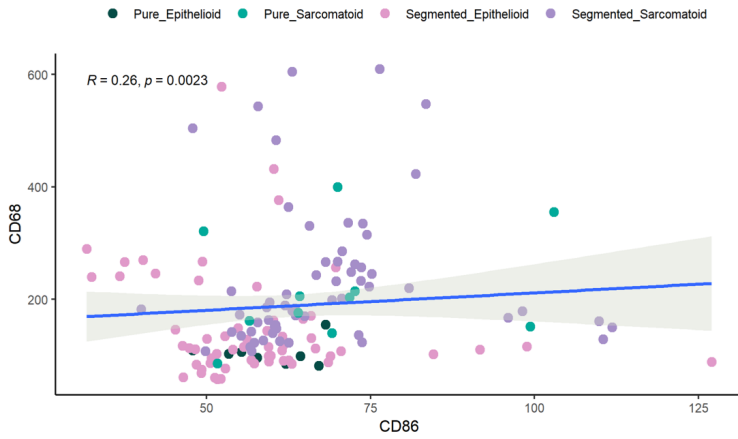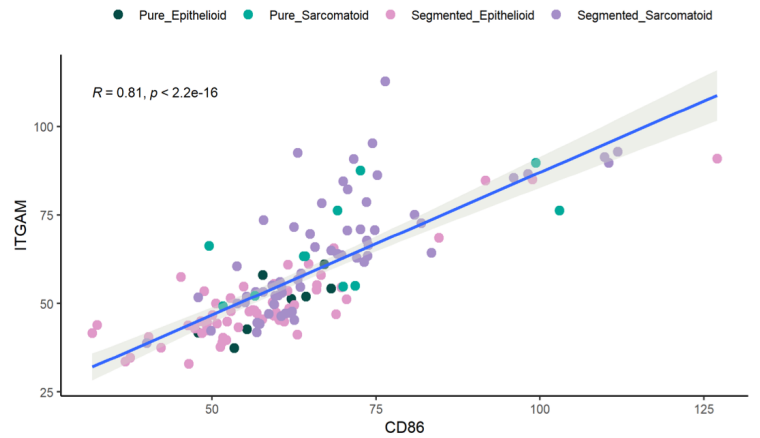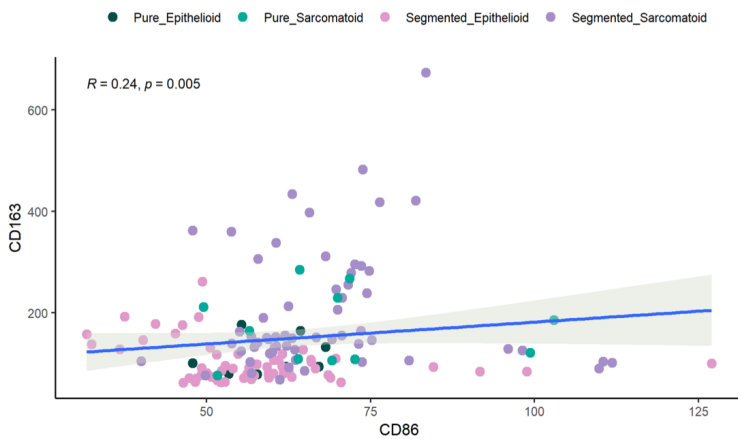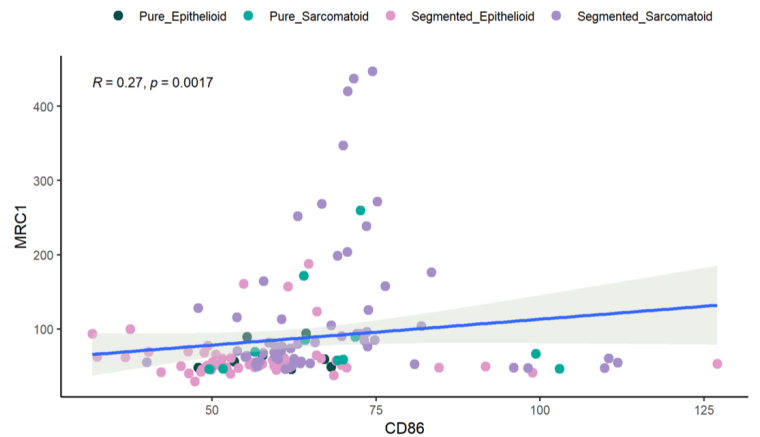

# SUPPLEMENTARY FIGURE 8

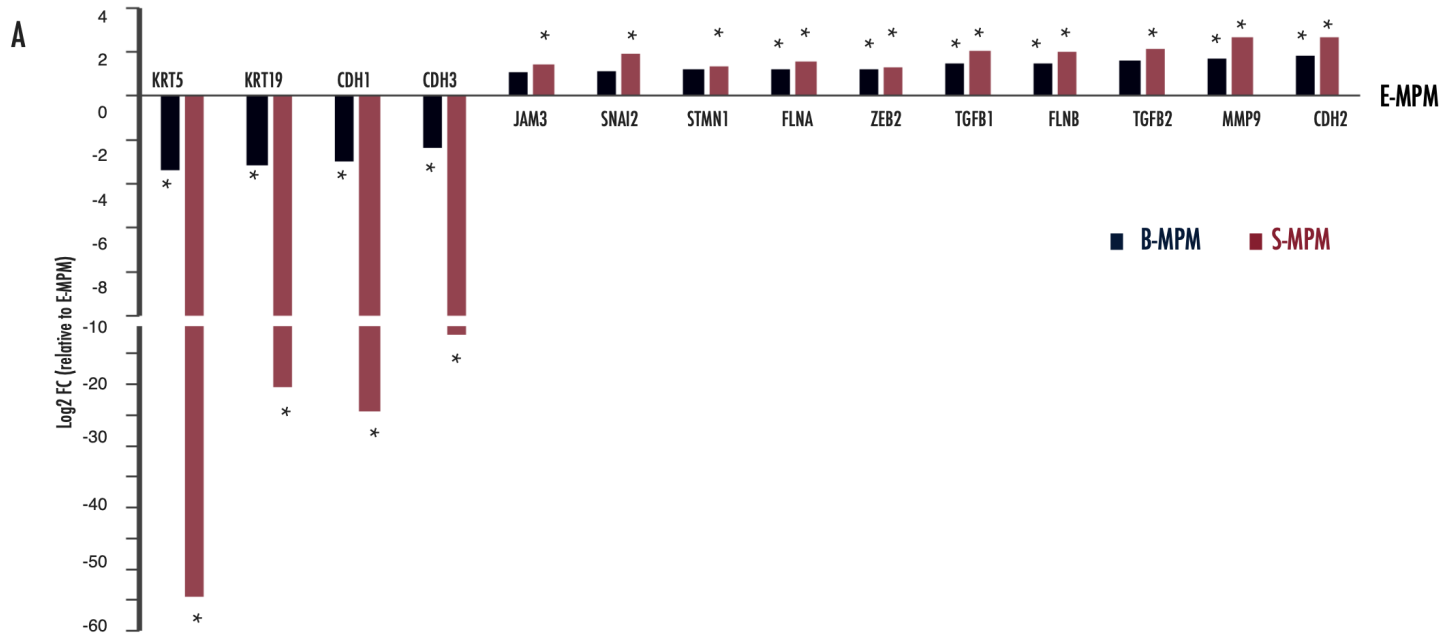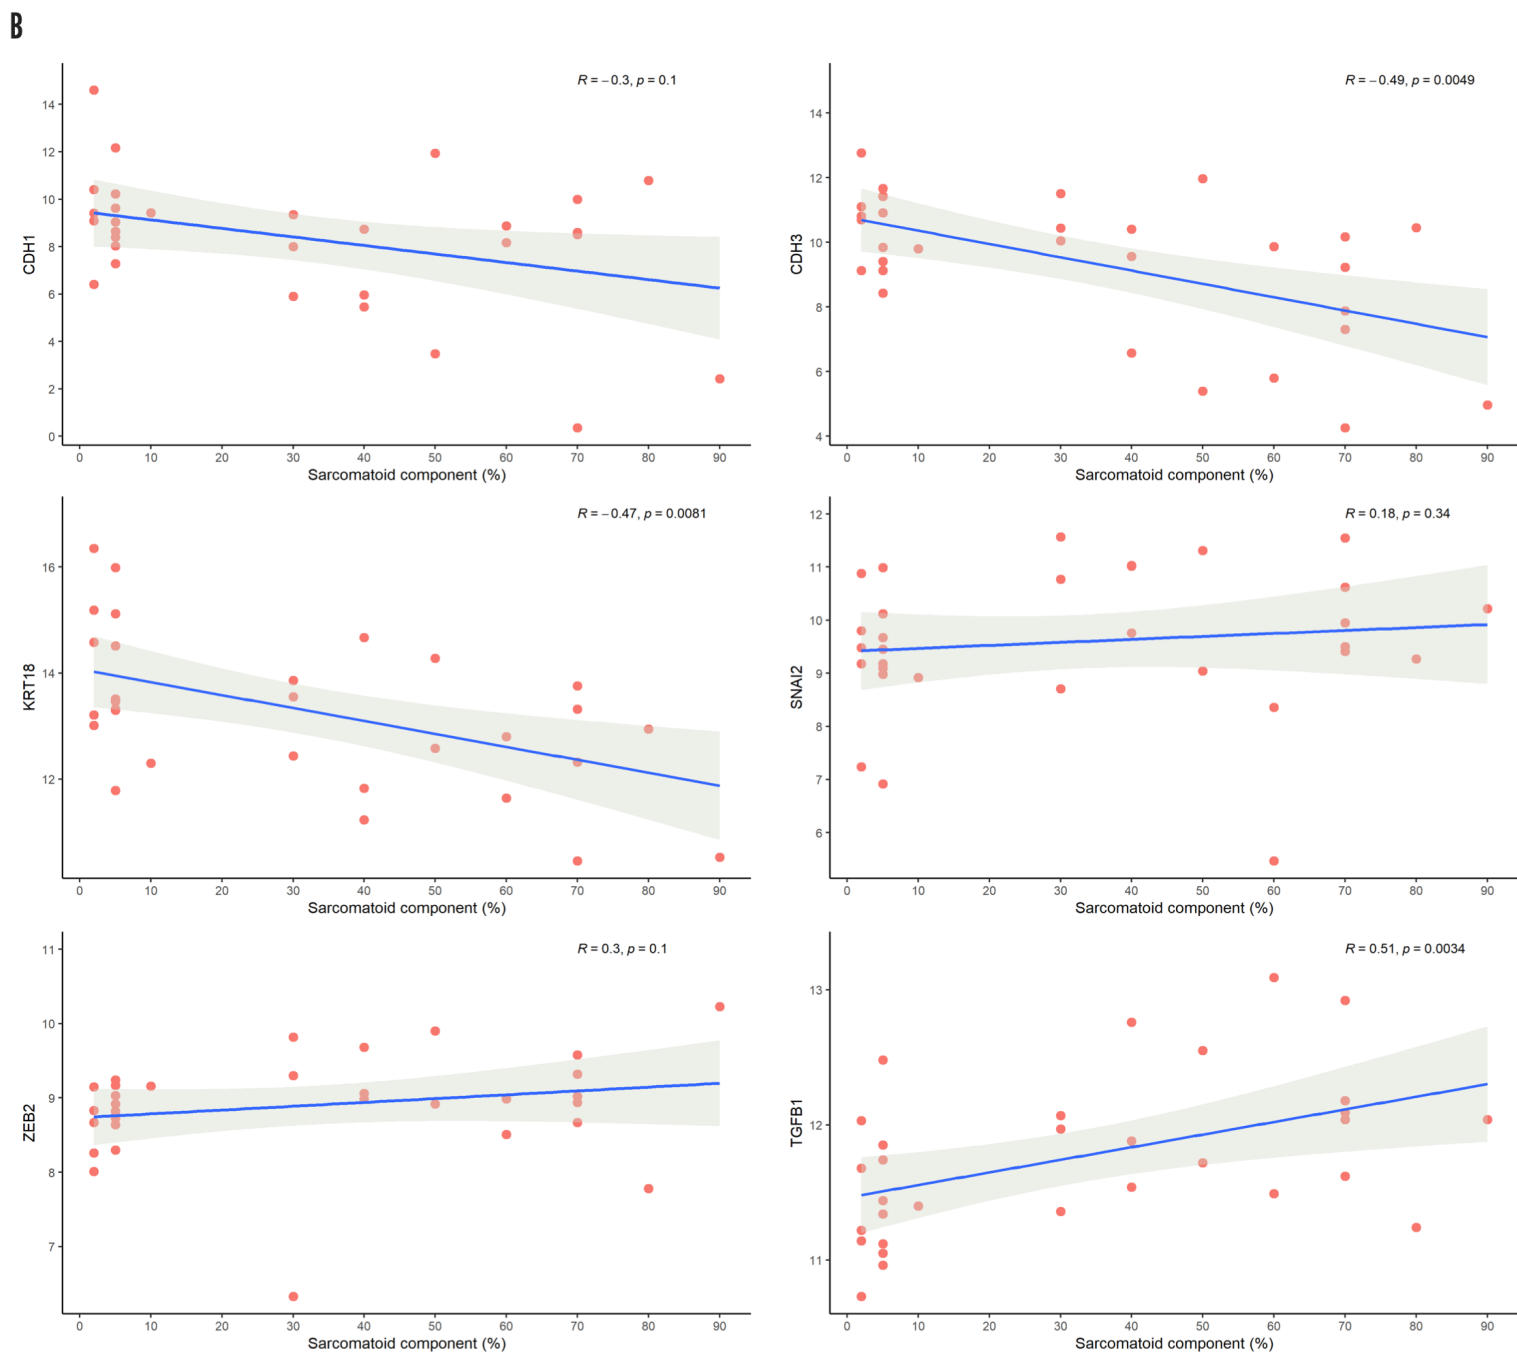



SUPPLEMENTARY FIGURE 9

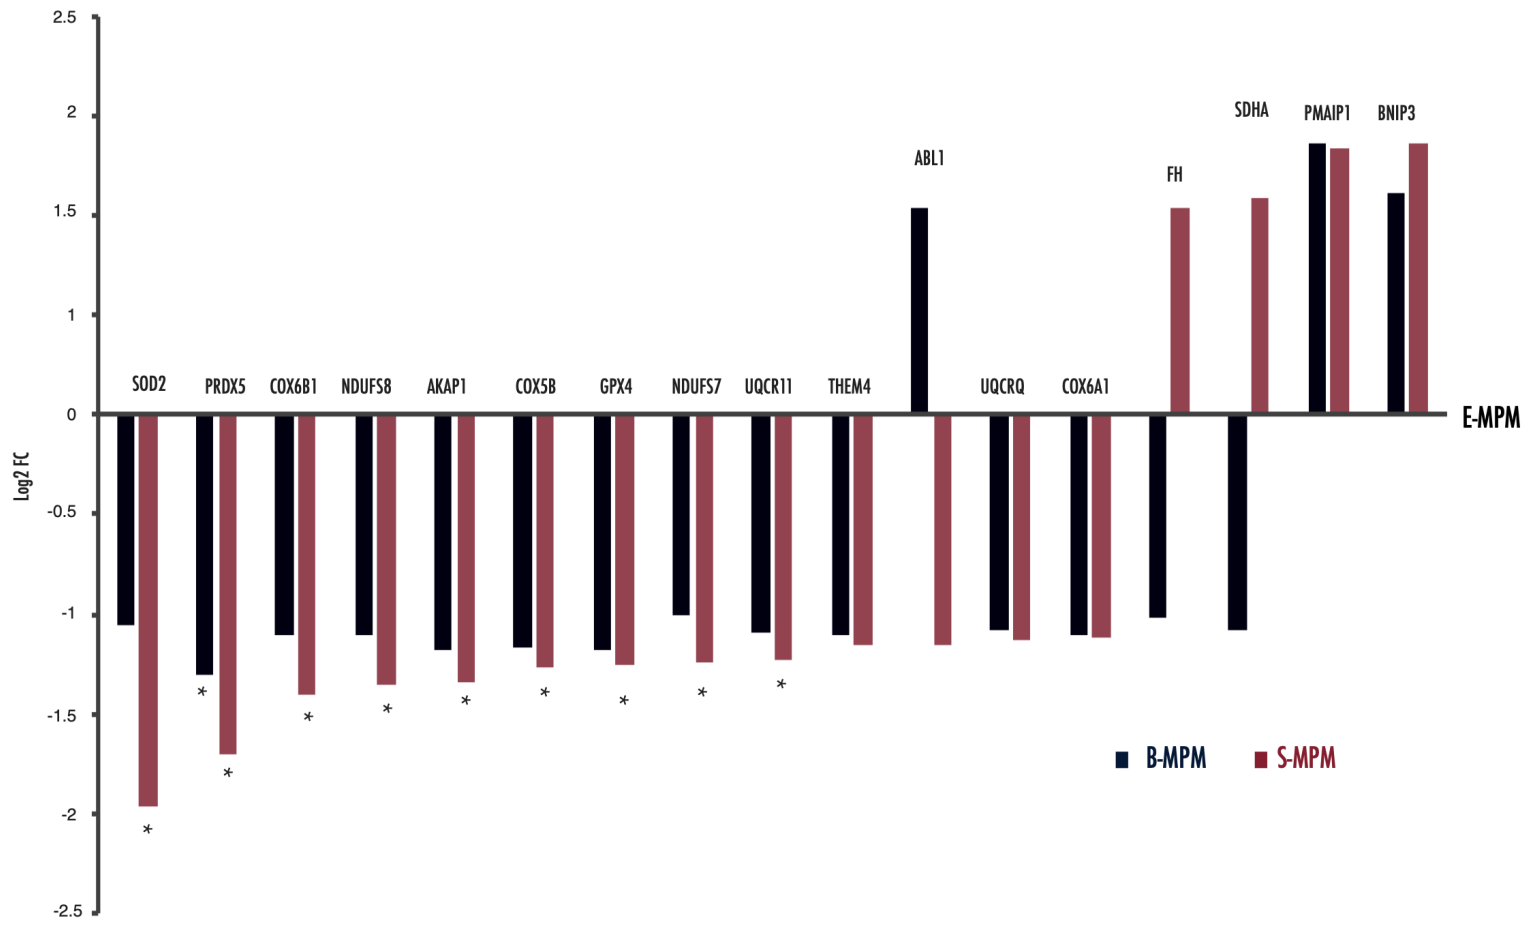

## **Supplementary Figure Legends**

### *Supplementary Figure 1*

A) GeoMx DSP scan showing AOIs from a representative B-MPM collected from a surgical pleurectomy. Large circles indicate segmented transitional AOIs while small circles circle indicate pure AOIs. B-C) Correlation analysis on all AOIs (B) or pure AOIs only (C)

### *Supplementary Figure 2*

A-B) STRING interaction networks summarizing principal genes involved in the indicated GO categories and their association with either E (A) or S (B) compartment. The networks are representative of the categories emerged in the GO analysis reported in Figure 2C. C-D) Bubble plots showing expression of CDH1(C) and ZEB1 (D) in two representative transitional areas, showing the complementary of the signals.

### *Supplementary Figure 3*

A) GO analysis on the genes differentially expressed between pS-AOIs and pE-AOIs. Full list of genes is provided in Supplementary Table 3. P value for GO categories is reported in Supplementary Table 4. B) GO analysis on the genes differentially expressed between tS-AOIs and tE-AOIs. Full list of genes is provided in Supplementary Table 5. P value for GO categories is reported in Supplementary Table 6.

### *Supplementary Figure 4*

Heatmap representing expression of all deregulated immune related genes in the 4 AOI groups. Color gradient expresses the z-score of each gene in each sample.

### *Supplementary Figure 5*

Box plots representing the expression level of indicated immune checkpoints in the different AOIs.

### *Supplementary Figure 6*

Scatter plots showing the direct expression correlation of TAMs related markers with EMT TFs and markers across all AOIs.

### *Supplementary Figure 7*

Scatter plots showing the direct expression correlation of TAMs related markers with immune checkpoints across all AOIs.

*Supplementary Figure 8*

A) Histograms reporting the relative expression of a panel of EMT markers in S-MPMs and biphasic MPMs (B-MPM) compared to E-MPMs. B) Scatter plots showing the correlation between the estimated percentage of sarcomatoid component and the expression of EMT markers in the B-MPMs subgroup included in our validation cohort.

*Supplementary Figure 9*

Histograms reporting the relative expression of a panel of genes involved in oxidative respiration and mitochondrial function in S-MPMs and biphasic MPMs (B-MPM) compared to E-MPMs.

Supplementary Table 1: Full list of differentially expressed genes in S vs E AOs

| <i>Target name</i> | <i>Log2 Fold Change<br/>(S-AOIs/E-AOIs)</i> | <i>Pvalue</i> | <i>Adjusted pvalue</i> |
|--------------------|---------------------------------------------|---------------|------------------------|
| <i>CSF1R</i>       | 1.011133                                    | 1.92E-35      | 2.01E-32               |
| <i>A2M</i>         | 1.263878                                    | 8.03E-35      | 4.21E-32               |
| <i>ITGA3</i>       | -1.18751                                    | 7.46E-33      | 2.02E-30               |
| <i>ENG</i>         | 0.922176                                    | 7.69E-33      | 2.02E-30               |
| <i>FCER1G</i>      | 0.835464                                    | 1.36E-32      | 2.85E-30               |
| <i>CTSS</i>        | 0.892046                                    | 8.16E-32      | 1.43E-29               |
| <i>HLA-DMB</i>     | 0.800581                                    | 1.08E-31      | 1.62E-29               |
| <i>FCGR3A/B</i>    | 1.071155                                    | 2.61E-31      | 3.37E-29               |
| <i>CD4</i>         | 0.769253                                    | 2.89E-31      | 3.37E-29               |
| <i>CD53</i>        | 0.737308                                    | 1.06E-30      | 1.11E-28               |
| <i>C1QA</i>        | 1.355796                                    | 2.16E-30      | 2.06E-28               |
| <i>C1QB</i>        | 1.210335                                    | 4.63E-30      | 4.04E-28               |
| <i>PECAM1</i>      | 0.813283                                    | 1.41E-29      | 1.06E-27               |
| <i>MS4A6A</i>      | 0.834868                                    | 1.42E-29      | 1.06E-27               |
| <i>HLA-DMA</i>     | 0.797812                                    | 3.62E-29      | 2.37E-27               |
| <i>ITGB2</i>       | 0.711527                                    | 3.54E-29      | 2.37E-27               |
| <i>CD14</i>        | 1.111031                                    | 7.34E-29      | 4.53E-27               |
| <i>HLA-DPA1</i>    | 0.835945                                    | 1.48E-28      | 8.61E-27               |
| <i>LCP1</i>        | 0.732087                                    | 2.02E-28      | 1.11E-26               |
| <i>HLA-DRB</i>     | 1.43533                                     | 2.25E-28      | 1.18E-26               |
| <i>CYBB</i>        | 0.830303                                    | 4.01E-28      | 2.00E-26               |
| <i>LAIR1</i>       | 0.60908                                     | 7.92E-28      | 3.78E-26               |
| <i>FGCR2A/B</i>    | 1.103551                                    | 1.95E-27      | 8.90E-26               |
| <i>WIPF1</i>       | 0.498167                                    | 1.70E-26      | 7.43E-25               |
| <i>HLA-DRA</i>     | 1.468951                                    | 2.02E-26      | 8.46E-25               |
| <i>TNFRSF1B</i>    | 0.494245                                    | 4.26E-26      | 1.72E-24               |
| <i>HLA-DRB3</i>    | 1.006682                                    | 8.68E-26      | 3.37E-24               |
| <i>PTPRC</i>       | 0.724594                                    | 3.35E-25      | 1.26E-23               |
| <i>KRT18</i>       | -1.69168                                    | 4.42E-25      | 1.60E-23               |
| <i>LAMA5</i>       | -1.18119                                    | 8.77E-25      | 3.07E-23               |
| <i>GIMAP4</i>      | 0.600613                                    | 1.37E-24      | 4.64E-23               |
| <i>CD74</i>        | 1.655193                                    | 1.52E-24      | 4.99E-23               |
| <i>FCGR1A</i>      | 0.642232                                    | 3.62E-24      | 1.15E-22               |
| <i>CD163</i>       | 0.813758                                    | 4.30E-24      | 1.33E-22               |
| <i>IL10RA</i>      | 0.576967                                    | 5.55E-24      | 1.66E-22               |
| <i>ZEB2</i>        | 0.58503                                     | 7.83E-24      | 2.28E-22               |

|                 |          |          |          |
|-----------------|----------|----------|----------|
| <i>HLA-DQA1</i> | 0.722306 | 8.96E-24 | 2.54E-22 |
| <i>KRT19</i>    | -1.68545 | 2.49E-23 | 6.87E-22 |
| <i>C3AR1</i>    | 0.510641 | 3.47E-23 | 9.32E-22 |
| <i>LILRB4</i>   | 0.598296 | 4.66E-23 | 1.22E-21 |
| <i>CLEC7A</i>   | 0.560096 | 1.15E-22 | 2.95E-21 |
| <i>ITGB4</i>    | -0.93849 | 2.76E-22 | 6.74E-21 |
| <i>LYZ</i>      | 1.341299 | 2.75E-22 | 6.74E-21 |
| <i>TBXAS1</i>   | 0.489776 | 3.48E-22 | 8.29E-21 |
| <i>CD84</i>     | 0.407021 | 6.26E-22 | 1.46E-20 |
| <i>FPR3</i>     | 0.402665 | 8.04E-22 | 1.83E-20 |
| <i>LAMC2</i>    | -0.7411  | 1.56E-21 | 3.49E-20 |
| <i>EPHA2</i>    | -0.54279 | 2.05E-21 | 4.47E-20 |
| <i>PRKDC</i>    | -0.43854 | 3.59E-21 | 7.69E-20 |
| <i>CD37</i>     | 0.446635 | 5.69E-21 | 1.19E-19 |
| <i>SPRED1</i>   | 0.341705 | 9.36E-21 | 1.92E-19 |
| <i>SLC39A6</i>  | -0.27555 | 1.69E-20 | 3.40E-19 |
| <i>CXCL16</i>   | 0.392065 | 2.72E-20 | 5.38E-19 |
| <i>MS4A4A</i>   | 0.505259 | 3.05E-20 | 5.93E-19 |
| <i>CFB</i>      | -1.28994 | 4.31E-20 | 8.21E-19 |
| <i>NCF4</i>     | 0.423397 | 5.03E-20 | 9.42E-19 |
| <i>HLA-DOA</i>  | 0.50412  | 5.20E-20 | 9.57E-19 |
| <i>CDH2</i>     | -0.70999 | 8.03E-20 | 1.45E-18 |
| <i>HLA-DRB4</i> | 0.812502 | 1.03E-19 | 1.80E-18 |
| <i>MET</i>      | -0.73598 | 1.01E-19 | 1.80E-18 |
| <i>IGF1R</i>    | -0.51112 | 1.13E-19 | 1.95E-18 |
| <i>CXADR</i>    | -0.4737  | 1.18E-19 | 1.99E-18 |
| <i>PPL</i>      | -0.65079 | 1.65E-19 | 2.75E-18 |
| <i>TLR1</i>     | 0.365261 | 1.76E-19 | 2.88E-18 |
| <i>HCK</i>      | 0.376192 | 5.39E-19 | 8.69E-18 |
| <i>INPP5D</i>   | 0.430494 | 6.72E-19 | 1.07E-17 |
| <i>LGALS9</i>   | 0.524902 | 6.90E-19 | 1.08E-17 |
| <i>DSP</i>      | -0.72458 | 2.33E-18 | 3.60E-17 |
| <i>FSTL3</i>    | -0.61115 | 9.79E-18 | 1.49E-16 |
| <i>FZD6</i>     | -0.35898 | 1.21E-17 | 1.81E-16 |
| <i>MRC1</i>     | 0.627983 | 1.36E-17 | 1.98E-16 |
| <i>CD68</i>     | 0.727373 | 1.34E-17 | 1.98E-16 |
| <i>FPR1</i>     | 0.362439 | 1.84E-17 | 2.64E-16 |
| <i>CD9</i>      | -0.70204 | 2.00E-17 | 2.83E-16 |
| <i>FGF9</i>     | -0.53115 | 3.79E-17 | 5.30E-16 |
| <i>JAK3</i>     | 0.401846 | 4.69E-17 | 6.47E-16 |
| <i>GIMAP6</i>   | 0.391801 | 5.28E-17 | 7.19E-16 |
| <i>FLNC</i>     | -0.77458 | 8.01E-17 | 1.08E-15 |
| <i>CD34</i>     | 0.451966 | 1.55E-16 | 2.06E-15 |
| <i>HAVCR2</i>   | 0.340373 | 2.13E-16 | 2.79E-15 |

|                |          |          |          |
|----------------|----------|----------|----------|
| <i>COL6A3</i>  | 1.332912 | 2.24E-16 | 2.89E-15 |
| <i>TLR2</i>    | 0.430028 | 2.90E-16 | 3.67E-15 |
| <i>SAMSN1</i>  | 0.391422 | 2.87E-16 | 3.67E-15 |
| <i>ITGA1</i>   | 0.596449 | 5.54E-16 | 6.92E-15 |
| <i>PDGFRB</i>  | 0.77377  | 6.07E-16 | 7.49E-15 |
| <i>ITGA4</i>   | 0.348064 | 6.37E-16 | 7.77E-15 |
| <i>CXCL12</i>  | 0.547031 | 6.79E-16 | 8.19E-15 |
| <i>TP53</i>    | -0.36318 | 7.77E-16 | 9.26E-15 |
| <i>CSF3R</i>   | 0.363416 | 9.98E-16 | 1.18E-14 |
| <i>COX6A1</i>  | -0.41151 | 1.44E-15 | 1.68E-14 |
| <i>GMIP</i>    | 0.241928 | 2.12E-15 | 2.44E-14 |
| <i>SMARCA4</i> | -0.36585 | 3.38E-15 | 3.85E-14 |
| <i>PTGER4</i>  | 0.288235 | 6.46E-15 | 7.29E-14 |
| <i>IRF8</i>    | 0.431974 | 8.44E-15 | 9.42E-14 |
| <i>TNFSF12</i> | 0.292745 | 8.70E-15 | 9.60E-14 |
| <i>HSP90B1</i> | -0.56841 | 9.01E-15 | 9.84E-14 |
| <i>GPSM3</i>   | 0.29494  | 1.01E-14 | 1.09E-13 |
| <i>SYK</i>     | 0.319652 | 1.24E-14 | 1.33E-13 |
| <i>THY1</i>    | 0.61562  | 1.36E-14 | 1.44E-13 |
| <i>MUC1</i>    | -0.55425 | 1.63E-14 | 1.71E-13 |
| <i>SIGLEC1</i> | 0.42458  | 1.70E-14 | 1.77E-13 |
| <i>LY6E</i>    | -0.61207 | 2.09E-14 | 2.15E-13 |
| <i>ITGAX</i>   | 0.390248 | 2.57E-14 | 2.62E-13 |
| <i>NID2</i>    | 0.46234  | 3.43E-14 | 3.46E-13 |
| <i>MSR1</i>    | 0.400176 | 3.65E-14 | 3.64E-13 |
| <i>GLS</i>     | -0.66658 | 5.84E-14 | 5.78E-13 |
| <i>EFNA1</i>   | -0.4241  | 7.92E-14 | 7.77E-13 |
| <i>SKP2</i>    | -0.36431 | 9.21E-14 | 8.94E-13 |
| <i>RASA4</i>   | 0.292567 | 9.59E-14 | 9.15E-13 |
| <i>CAPN2</i>   | -0.41913 | 9.58E-14 | 9.15E-13 |
| <i>S100A9</i>  | 0.682518 | 1.49E-13 | 1.41E-12 |
| <i>F13A1</i>   | 0.811226 | 1.68E-13 | 1.57E-12 |
| <i>ACTA2</i>   | 0.733924 | 1.91E-13 | 1.77E-12 |
| <i>PVR</i>     | -0.21645 | 2.70E-13 | 2.48E-12 |
| <i>SFRP4</i>   | 0.657073 | 2.96E-13 | 2.70E-12 |
| <i>C4B</i>     | -1.31006 | 3.00E-13 | 2.71E-12 |
| <i>JAML</i>    | 0.445249 | 3.47E-13 | 3.11E-12 |
| <i>PRDX5</i>   | -0.328   | 4.48E-13 | 3.98E-12 |
| <i>EGFR</i>    | -0.56388 | 7.19E-13 | 6.28E-12 |
| <i>LILRB1</i>  | 0.315144 | 7.15E-13 | 6.28E-12 |
| <i>TFRC</i>    | -0.38001 | 7.83E-13 | 6.79E-12 |
| <i>RAC2</i>    | 0.390937 | 9.66E-13 | 8.31E-12 |
| <i>TLR4</i>    | 0.312615 | 1.04E-12 | 8.90E-12 |
| <i>ERBB2</i>   | -0.32928 | 1.16E-12 | 9.78E-12 |

|                  |          |          |          |
|------------------|----------|----------|----------|
| <i>CDH3</i>      | -0.40994 | 1.52E-12 | 1.28E-11 |
| <i>PRDM1</i>     | 0.291707 | 2.25E-12 | 1.87E-11 |
| <i>ITGB8</i>     | -0.28415 | 2.34E-12 | 1.93E-11 |
| <i>EFNA5</i>     | -0.37854 | 3.10E-12 | 2.54E-11 |
| <i>ELMO1</i>     | 0.315471 | 3.21E-12 | 2.61E-11 |
| <i>HLA-DQB1</i>  | 0.348572 | 3.95E-12 | 3.19E-11 |
| <i>C1S</i>       | -0.73027 | 4.19E-12 | 3.35E-11 |
| <i>ARNT2</i>     | -0.21299 | 4.50E-12 | 3.58E-11 |
| <i>ITGAL</i>     | 0.374261 | 4.63E-12 | 3.65E-11 |
| <i>ATP2A2</i>    | -0.37016 | 4.98E-12 | 3.90E-11 |
| <i>WEE1</i>      | -0.29392 | 5.03E-12 | 3.91E-11 |
| <i>SFRP2</i>     | 0.773609 | 5.08E-12 | 3.92E-11 |
| <i>TREM2</i>     | 0.304756 | 5.16E-12 | 3.95E-11 |
| <i>YTHDF2</i>    | -0.21862 | 6.63E-12 | 5.04E-11 |
| <i>ILF3</i>      | -0.3736  | 6.96E-12 | 5.25E-11 |
| <i>TNFRSF10B</i> | -0.25682 | 7.79E-12 | 5.83E-11 |
| <i>SLC16A1</i>   | -0.54001 | 7.92E-12 | 5.89E-11 |
| <i>NOTCH2</i>    | -0.47509 | 8.59E-12 | 6.35E-11 |
| <i>MERTK</i>     | 0.265167 | 8.89E-12 | 6.52E-11 |
| <i>ITGAM</i>     | 0.379229 | 9.34E-12 | 6.76E-11 |
| <i>LILRB2</i>    | 0.468208 | 9.31E-12 | 6.76E-11 |
| <i>CD46</i>      | -0.24684 | 1.48E-11 | 1.06E-10 |
| <i>MCAM</i>      | 0.499208 | 1.80E-11 | 1.29E-10 |
| <i>PLOD2</i>     | -0.85263 | 1.93E-11 | 1.37E-10 |
| <i>NDUFA13</i>   | -0.33889 | 2.00E-11 | 1.41E-10 |
| <i>TPR</i>       | -0.23764 | 2.09E-11 | 1.46E-10 |
| <i>LYN</i>       | 0.223166 | 2.53E-11 | 1.76E-10 |
| <i>API5</i>      | -0.19476 | 2.61E-11 | 1.80E-10 |
| <i>NRP1</i>      | 0.54055  | 3.25E-11 | 2.23E-10 |
| <i>WT1</i>       | -0.48921 | 3.90E-11 | 2.66E-10 |
| <i>KRT5</i>      | -0.64177 | 4.48E-11 | 3.03E-10 |
| <i>GAS1</i>      | -0.69393 | 4.79E-11 | 3.22E-10 |
| <i>MST1R</i>     | -0.31824 | 5.18E-11 | 3.46E-10 |
| <i>RAD21</i>     | -0.39823 | 5.22E-11 | 3.47E-10 |
| <i>NECTIN2</i>   | -0.47488 | 5.80E-11 | 3.82E-10 |
| <i>C5AR1</i>     | 0.287622 | 7.39E-11 | 4.85E-10 |
| <i>NDUFS8</i>    | -0.2476  | 8.24E-11 | 5.37E-10 |
| <i>PSMB10</i>    | 0.239819 | 8.43E-11 | 5.46E-10 |
| <i>EIF4EBP1</i>  | -0.29937 | 9.06E-11 | 5.83E-10 |
| <i>IL2RB</i>     | 0.327839 | 9.30E-11 | 5.95E-10 |
| <i>NUP107</i>    | -0.20811 | 9.96E-11 | 6.33E-10 |
| <i>PUM1</i>      | -0.23473 | 1.01E-10 | 6.35E-10 |
| <i>TRAC</i>      | 0.436342 | 1.04E-10 | 6.56E-10 |
| <i>MIF</i>       | -0.57136 | 1.27E-10 | 7.95E-10 |

|                  |          |          |          |
|------------------|----------|----------|----------|
| <i>CDH5</i>      | 0.34026  | 1.32E-10 | 8.22E-10 |
| <i>OLFML2B</i>   | 0.421618 | 1.39E-10 | 8.60E-10 |
| <i>LIF</i>       | -0.33737 | 1.47E-10 | 8.99E-10 |
| <i>NDUFA7</i>    | -0.19868 | 1.66E-10 | 1.01E-09 |
| <i>CLU</i>       | -0.85908 | 1.80E-10 | 1.09E-09 |
| <i>DSC3</i>      | -0.25615 | 1.87E-10 | 1.13E-09 |
| <i>GTF3C1</i>    | -0.25896 | 1.91E-10 | 1.15E-09 |
| <i>ALCAM</i>     | -0.57583 | 2.05E-10 | 1.22E-09 |
| <i>SERINC3</i>   | -0.18859 | 2.11E-10 | 1.25E-09 |
| <i>PSMB7</i>     | -0.32828 | 2.29E-10 | 1.35E-09 |
| <i>STAG2</i>     | -0.17272 | 2.38E-10 | 1.40E-09 |
| <i>C7</i>        | 0.851285 | 2.50E-10 | 1.46E-09 |
| <i>ASNS</i>      | -0.24815 | 2.86E-10 | 1.66E-09 |
| <i>TNFRSF1A</i>  | -0.26952 | 3.60E-10 | 2.07E-09 |
| <i>CCL3/L1</i>   | 0.40565  | 3.78E-10 | 2.17E-09 |
| <i>CACNB3</i>    | -0.28114 | 4.37E-10 | 2.49E-09 |
| <i>CD36</i>      | 0.354452 | 4.83E-10 | 2.74E-09 |
| <i>SIN3A</i>     | -0.14567 | 5.40E-10 | 3.04E-09 |
| <i>VCAN</i>      | 0.755108 | 6.23E-10 | 3.50E-09 |
| <i>KEAP1</i>     | -0.16498 | 6.68E-10 | 3.73E-09 |
| <i>SOD1</i>      | -0.2851  | 7.24E-10 | 4.02E-09 |
| <i>MAP3K7</i>    | -0.19139 | 7.89E-10 | 4.35E-09 |
| <i>NDUFB10</i>   | -0.19283 | 9.94E-10 | 5.43E-09 |
| <i>AXIN1</i>     | -0.19317 | 9.93E-10 | 5.43E-09 |
| <i>MSH6</i>      | -0.19899 | 1.13E-09 | 6.15E-09 |
| <i>GOT2</i>      | -0.16908 | 1.14E-09 | 6.15E-09 |
| <i>MCM7</i>      | -0.28625 | 1.18E-09 | 6.37E-09 |
| <i>RIPK3</i>     | 0.204609 | 1.21E-09 | 6.47E-09 |
| <i>FLNB</i>      | -0.40747 | 1.22E-09 | 6.49E-09 |
| <i>IL4R</i>      | 0.171963 | 1.36E-09 | 7.22E-09 |
| <i>PPP2R1A</i>   | -0.28259 | 1.42E-09 | 7.48E-09 |
| <i>CD200</i>     | -0.39922 | 1.47E-09 | 7.71E-09 |
| <i>BMP4</i>      | -0.41149 | 1.61E-09 | 8.38E-09 |
| <i>CIC</i>       | -0.17645 | 1.61E-09 | 8.38E-09 |
| <i>FCGRT</i>     | 0.288929 | 1.69E-09 | 8.68E-09 |
| <i>C1R</i>       | -0.55416 | 1.69E-09 | 8.68E-09 |
| <i>COL3A1</i>    | 0.607205 | 1.77E-09 | 9.06E-09 |
| <i>SLC11A1</i>   | 0.330345 | 1.93E-09 | 9.85E-09 |
| <i>CMKLR1</i>    | 0.297513 | 3.01E-09 | 1.53E-08 |
| <i>ANLN</i>      | -0.25485 | 3.08E-09 | 1.55E-08 |
| <i>CDK6</i>      | -0.48132 | 3.23E-09 | 1.62E-08 |
| <i>DNAJC14</i>   | -0.15028 | 3.45E-09 | 1.73E-08 |
| <i>MAP3K20</i>   | -0.25984 | 3.90E-09 | 1.94E-08 |
| <i>TNFRSF12A</i> | -0.36664 | 4.05E-09 | 2.01E-08 |



|          |          |          |          |
|----------|----------|----------|----------|
| REL      | 0.211566 | 4.45E-09 | 2.19E-08 |
| TLR7     | 0.254655 | 4.53E-09 | 2.22E-08 |
| PRKCD    | 0.170845 | 5.15E-09 | 2.51E-08 |
| MCM4     | -0.22748 | 5.23E-09 | 2.54E-08 |
| BBS1     | -0.1559  | 5.83E-09 | 2.82E-08 |
| APP      | -0.53077 | 6.40E-09 | 3.08E-08 |
| NDUFA1   | -0.20942 | 6.46E-09 | 3.10E-08 |
| SMAD3    | -0.19904 | 6.57E-09 | 3.13E-08 |
| IL17RA   | 0.215204 | 6.72E-09 | 3.19E-08 |
| ANXA1    | -0.37111 | 6.92E-09 | 3.27E-08 |
| BAD      | -0.19519 | 7.66E-09 | 3.60E-08 |
| HSPA6    | 0.513136 | 8.05E-09 | 3.77E-08 |
| C1QBP    | -0.22892 | 8.50E-09 | 3.96E-08 |
| IFNGR2   | 0.262482 | 1.08E-08 | 5.01E-08 |
| TYMP     | 0.332293 | 1.18E-08 | 5.47E-08 |
| NUMBL    | -0.24598 | 1.26E-08 | 5.80E-08 |
| COL1A2   | 0.696029 | 1.30E-08 | 5.95E-08 |
| FLT1     | 0.309169 | 1.35E-08 | 6.18E-08 |
| CSF2RB   | 0.252021 | 1.56E-08 | 7.10E-08 |
| PRKAR1B  | -0.24644 | 1.58E-08 | 7.16E-08 |
| CASP1    | 0.239581 | 1.74E-08 | 7.83E-08 |
| PSMC4    | -0.13169 | 1.84E-08 | 8.26E-08 |
| PDGFC    | -0.22369 | 1.93E-08 | 8.63E-08 |
| STMN1    | -0.23648 | 2.00E-08 | 8.87E-08 |
| IL2RA    | 0.292979 | 2.09E-08 | 9.27E-08 |
| ETS1     | 0.261692 | 2.27E-08 | 1.00E-07 |
| APLNR    | 0.288806 | 2.44E-08 | 1.07E-07 |
| TNKS     | -0.13662 | 2.50E-08 | 1.09E-07 |
| COX6B1   | -0.24415 | 2.58E-08 | 1.12E-07 |
| HLA-DRB5 | 0.237889 | 2.58E-08 | 1.12E-07 |
| TUBB     | -0.4146  | 2.63E-08 | 1.13E-07 |
| IL2RG    | 0.293012 | 2.70E-08 | 1.16E-07 |
| TGFB2    | -0.7393  | 2.73E-08 | 1.17E-07 |
| PHGDH    | -0.30327 | 2.75E-08 | 1.17E-07 |
| TRBC1/2  | 0.545807 | 3.00E-08 | 1.28E-07 |
| HDAC6    | -0.13761 | 3.08E-08 | 1.30E-07 |
| FGF18    | -0.29148 | 3.42E-08 | 1.44E-07 |
| VCAM1    | 0.289027 | 3.50E-08 | 1.47E-07 |
| IL21R    | 0.231736 | 3.74E-08 | 1.56E-07 |
| POLR2H   | -0.18683 | 3.81E-08 | 1.58E-07 |
| AKT2     | -0.22174 | 4.14E-08 | 1.72E-07 |
| PIK3CD   | 0.198624 | 4.39E-08 | 1.81E-07 |
| IL1R1    | 0.231761 | 5.48E-08 | 2.24E-07 |
| FGFR1    | -0.3553  | 5.46E-08 | 2.24E-07 |

|                |          |          |          |
|----------------|----------|----------|----------|
| <i>RRAS2</i>   | -0.1975  | 5.48E-08 | 2.24E-07 |
| <i>SERINC1</i> | -0.21611 | 5.78E-08 | 2.35E-07 |
| <i>CCNB1</i>   | -0.21688 | 5.80E-08 | 2.35E-07 |
| <i>SMC1A</i>   | -0.14292 | 6.16E-08 | 2.49E-07 |
| <i>NDUFB7</i>  | -0.1337  | 6.57E-08 | 2.64E-07 |
| <i>CD48</i>    | 0.239847 | 6.78E-08 | 2.72E-07 |
| <i>THEM4</i>   | -0.14663 | 7.02E-08 | 2.80E-07 |
| <i>ITGA6</i>   | -0.17314 | 7.56E-08 | 3.00E-07 |
| <i>NDUFA11</i> | -0.23717 | 7.80E-08 | 3.09E-07 |
| <i>SMPD3</i>   | -0.49242 | 7.98E-08 | 3.15E-07 |
| <i>NKG7</i>    | 0.29034  | 8.31E-08 | 3.26E-07 |
| <i>STAT3</i>   | -0.29646 | 8.44E-08 | 3.30E-07 |
| <i>FOXC1</i>   | -0.21379 | 8.95E-08 | 3.49E-07 |
| <i>CKLF</i>    | 0.242249 | 9.31E-08 | 3.61E-07 |
| <i>WNT2B</i>   | -0.52325 | 9.31E-08 | 3.61E-07 |
| <i>ICAM1</i>   | -0.44791 | 9.88E-08 | 3.81E-07 |
| <i>HACD2</i>   | -0.24299 | 1.01E-07 | 3.89E-07 |
| <i>UQCR11</i>  | -0.11729 | 1.06E-07 | 4.05E-07 |
| <i>CNOT2</i>   | -0.12343 | 1.32E-07 | 5.02E-07 |
| <i>CCL4</i>    | 0.358323 | 1.33E-07 | 5.05E-07 |
| <i>S100A8</i>  | 0.394993 | 1.36E-07 | 5.15E-07 |
| <i>RPL23</i>   | -0.40287 | 1.64E-07 | 6.15E-07 |
| <i>U2AF1</i>   | -0.24714 | 1.64E-07 | 6.15E-07 |
| <i>MDM2</i>    | -0.31399 | 1.73E-07 | 6.42E-07 |
| <i>CX3CR1</i>  | 0.347282 | 1.73E-07 | 6.42E-07 |
| <i>TMEM140</i> | 0.209458 | 1.94E-07 | 7.21E-07 |
| <i>KRT7</i>    | -0.56868 | 2.01E-07 | 7.43E-07 |
| <i>PPP2CB</i>  | -0.23075 | 2.09E-07 | 7.70E-07 |
| <i>CDK4</i>    | -0.21753 | 2.30E-07 | 8.44E-07 |
| <i>TOP2A</i>   | -0.32738 | 2.33E-07 | 8.50E-07 |
| <i>CD55</i>    | -0.20731 | 2.39E-07 | 8.69E-07 |
| <i>NDUFB4</i>  | -0.18874 | 2.51E-07 | 9.12E-07 |
| <i>ANP32B</i>  | -0.24397 | 2.76E-07 | 9.97E-07 |
| <i>SFXN1</i>   | -0.1617  | 2.77E-07 | 9.97E-07 |
| <i>CCL5</i>    | 0.390667 | 2.93E-07 | 1.05E-06 |
| <i>CD2</i>     | 0.282315 | 2.96E-07 | 1.06E-06 |
| <i>TRAF7</i>   | -0.16929 | 3.05E-07 | 1.09E-06 |
| <i>RUNX3</i>   | 0.221669 | 3.32E-07 | 1.18E-06 |
| <i>ITCH</i>    | -0.20451 | 3.35E-07 | 1.19E-06 |
| <i>RB1</i>     | 0.128938 | 3.45E-07 | 1.22E-06 |
| <i>ERCC3</i>   | -0.14377 | 3.71E-07 | 1.31E-06 |
| <i>COX5B</i>   | -0.21632 | 3.90E-07 | 1.37E-06 |
| <i>PLA2G2A</i> | -0.5338  | 4.19E-07 | 1.47E-06 |
| <i>CTSH</i>    | 0.306831 | 4.73E-07 | 1.64E-06 |

|                |          |          |          |
|----------------|----------|----------|----------|
| <i>MAPK9</i>   | -0.10472 | 4.72E-07 | 1.64E-06 |
| <i>IL18</i>    | -0.38205 | 4.92E-07 | 1.70E-06 |
| <i>LDHB</i>    | -0.33068 | 4.99E-07 | 1.72E-06 |
| <i>CD83</i>    | 0.232294 | 5.31E-07 | 1.82E-06 |
| <i>ANKRD28</i> | -0.18854 | 5.78E-07 | 1.98E-06 |
| <i>MSH2</i>    | -0.14059 | 5.80E-07 | 1.98E-06 |
| <i>UBA7</i>    | 0.17068  | 6.55E-07 | 2.22E-06 |
| <i>MAP3K1</i>  | 0.164434 | 6.60E-07 | 2.23E-06 |
| <i>PSMB2</i>   | -0.10063 | 7.39E-07 | 2.49E-06 |
| <i>COL1A1</i>  | 0.52775  | 7.48E-07 | 2.51E-06 |
| <i>B2M</i>     | 0.508611 | 8.07E-07 | 2.71E-06 |
| <i>ERCC2</i>   | -0.16073 | 8.20E-07 | 2.74E-06 |
| <i>RAF1</i>    | -0.13711 | 8.56E-07 | 2.85E-06 |
| <i>BST2</i>    | -0.22846 | 8.68E-07 | 2.88E-06 |
| <i>NPM1</i>    | -0.19704 | 9.75E-07 | 3.23E-06 |
| <i>GNA11</i>   | -0.14911 | 1.05E-06 | 3.46E-06 |
| <i>PTPN11</i>  | -0.14803 | 1.07E-06 | 3.50E-06 |
| <i>CXCR4</i>   | 0.459678 | 1.08E-06 | 3.53E-06 |
| <i>PEBP1</i>   | -0.28578 | 1.09E-06 | 3.56E-06 |
| <i>NF1</i>     | -0.17544 | 1.18E-06 | 3.83E-06 |
| <i>MRPL19</i>  | -0.14359 | 1.26E-06 | 4.09E-06 |
| <i>MEN1</i>    | -0.15629 | 1.39E-06 | 4.49E-06 |
| <i>AKAP1</i>   | -0.14987 | 1.60E-06 | 5.17E-06 |
| <i>RAC1</i>    | -0.23297 | 1.78E-06 | 5.74E-06 |
| <i>NDUFA12</i> | -0.10921 | 1.82E-06 | 5.84E-06 |
| <i>CCR5</i>    | 0.229333 | 1.94E-06 | 6.21E-06 |
| <i>BRD3</i>    | -0.21992 | 2.12E-06 | 6.77E-06 |
| <i>CDC25B</i>  | -0.24738 | 2.25E-06 | 7.12E-06 |
| <i>HDAC2</i>   | -0.20922 | 2.24E-06 | 7.12E-06 |
| <i>CDH1</i>    | -0.26031 | 2.44E-06 | 7.70E-06 |
| <i>SFN</i>     | -0.2068  | 2.48E-06 | 7.81E-06 |
| <i>TRAF2</i>   | -0.13944 | 2.89E-06 | 9.06E-06 |
| <i>IL1RAP</i>  | -0.21141 | 2.90E-06 | 9.07E-06 |
| <i>CD47</i>    | -0.19401 | 2.91E-06 | 9.09E-06 |
| <i>NSD3</i>    | -0.15501 | 3.05E-06 | 9.48E-06 |
| <i>NLRC5</i>   | 0.187998 | 3.21E-06 | 9.95E-06 |
| <i>SRSF2</i>   | -0.20186 | 3.31E-06 | 1.02E-05 |
| <i>CD86</i>    | 0.246606 | 3.35E-06 | 1.03E-05 |
| <i>MFNG</i>    | 0.16072  | 3.37E-06 | 1.04E-05 |
| <i>GNG12</i>   | -0.14149 | 3.40E-06 | 1.04E-05 |
| <i>EGR2</i>    | 0.25951  | 3.45E-06 | 1.06E-05 |
| <i>BCL2</i>    | 0.195452 | 3.60E-06 | 1.10E-05 |
| <i>ACY1</i>    | -0.14471 | 3.62E-06 | 1.10E-05 |
| <i>SMC3</i>    | -0.1106  | 3.70E-06 | 1.12E-05 |

|                 |          |          |          |
|-----------------|----------|----------|----------|
| <i>CENPF</i>    | -0.20534 | 4.11E-06 | 1.24E-05 |
| <i>FLNA</i>     | -0.35701 | 4.57E-06 | 1.38E-05 |
| <i>SAA1</i>     | -0.61135 | 4.78E-06 | 1.44E-05 |
| <i>SDHA</i>     | -0.17386 | 4.94E-06 | 1.48E-05 |
| <i>SMAD4</i>    | -0.15137 | 5.19E-06 | 1.55E-05 |
| <i>TAPBP</i>    | -0.12957 | 5.33E-06 | 1.59E-05 |
| <i>ANGPT2</i>   | 0.223532 | 5.40E-06 | 1.60E-05 |
| <i>CCND2</i>    | 0.239758 | 5.68E-06 | 1.68E-05 |
| <i>FANCF</i>    | -0.125   | 5.92E-06 | 1.75E-05 |
| <i>CTSW</i>     | 0.197295 | 5.96E-06 | 1.76E-05 |
| <i>CACNG4</i>   | -0.1854  | 5.99E-06 | 1.76E-05 |
| <i>PDPN</i>     | -0.33676 | 6.51E-06 | 1.91E-05 |
| <i>POLR2A</i>   | -0.17203 | 6.97E-06 | 2.04E-05 |
| <i>ARNT</i>     | -0.13812 | 7.09E-06 | 2.07E-05 |
| <i>COL4A5</i>   | -0.27425 | 7.21E-06 | 2.09E-05 |
| <i>POLR2D</i>   | -0.12765 | 7.22E-06 | 2.09E-05 |
| <i>H2AX</i>     | -0.20398 | 7.36E-06 | 2.13E-05 |
| <i>LTBR</i>     | -0.16592 | 7.49E-06 | 2.16E-05 |
| <i>MIB1</i>     | -0.11281 | 9.17E-06 | 2.63E-05 |
| <i>C2</i>       | 0.214297 | 9.45E-06 | 2.70E-05 |
| <i>MYC</i>      | -0.32905 | 9.81E-06 | 2.80E-05 |
| <i>NFATC2</i>   | 0.16967  | 1.01E-05 | 2.88E-05 |
| <i>PCNA</i>     | -0.19601 | 1.12E-05 | 3.17E-05 |
| <i>GTF2H3</i>   | -0.10131 | 1.16E-05 | 3.29E-05 |
| <i>SOS2</i>     | 0.112683 | 1.20E-05 | 3.38E-05 |
| <i>RAD50</i>    | -0.11461 | 1.25E-05 | 3.51E-05 |
| <i>JUP</i>      | -0.14144 | 1.28E-05 | 3.59E-05 |
| <i>DIPK2B</i>   | 0.242099 | 1.34E-05 | 3.75E-05 |
| <i>ALDOA</i>    | -0.41327 | 1.64E-05 | 4.57E-05 |
| <i>ADAM12</i>   | 0.201032 | 1.69E-05 | 4.69E-05 |
| <i>TNFRSF14</i> | 0.164197 | 1.78E-05 | 4.95E-05 |
| <i>MAVS</i>     | -0.13468 | 1.86E-05 | 5.16E-05 |
| <i>JAM3</i>     | 0.136364 | 1.94E-05 | 5.36E-05 |
| <i>JAK2</i>     | 0.153036 | 1.96E-05 | 5.41E-05 |
| <i>CPSF7</i>    | -0.16164 | 2.08E-05 | 5.72E-05 |
| <i>CD3E</i>     | 0.221651 | 2.17E-05 | 5.94E-05 |
| <i>MAP2K2</i>   | -0.17644 | 2.28E-05 | 6.23E-05 |
| <i>NFE2L2</i>   | -0.16535 | 2.34E-05 | 6.38E-05 |
| <i>NOTCH3</i>   | 0.417147 | 2.39E-05 | 6.48E-05 |
| <i>TFE3</i>     | -0.13268 | 2.49E-05 | 6.76E-05 |
| <i>NSD2</i>     | -0.13151 | 2.58E-05 | 6.96E-05 |
| <i>TET2</i>     | 0.127417 | 2.67E-05 | 7.17E-05 |
| <i>BAMBI</i>    | -0.15289 | 2.66E-05 | 7.17E-05 |
| <i>PDGFB</i>    | 0.199203 | 2.67E-05 | 7.17E-05 |

|           |          |          |          |
|-----------|----------|----------|----------|
| RRAD      | -0.25499 | 2.85E-05 | 7.64E-05 |
| UBC       | -0.27498 | 3.00E-05 | 8.00E-05 |
| ABCF1     | -0.12127 | 3.10E-05 | 8.26E-05 |
| RICTOR    | -0.10823 | 3.24E-05 | 8.60E-05 |
| NDUFA3    | -0.11417 | 3.56E-05 | 9.42E-05 |
| BRD4      | -0.22659 | 3.62E-05 | 9.57E-05 |
| TBP       | -0.10672 | 3.68E-05 | 9.70E-05 |
| FUBP1     | -0.16627 | 3.75E-05 | 9.85E-05 |
| CD81      | -0.32966 | 3.90E-05 | 0.000102 |
| IRAK1     | -0.21545 | 3.95E-05 | 0.000103 |
| RPL7A     | -0.42034 | 4.11E-05 | 0.000107 |
| LEF1      | 0.23489  | 4.22E-05 | 0.000109 |
| CCND1     | -0.26113 | 4.37E-05 | 0.000113 |
| CD8A      | 0.206745 | 4.38E-05 | 0.000113 |
| HHIP      | -0.44276 | 4.41E-05 | 0.000114 |
| ATF1      | -0.10827 | 4.51E-05 | 0.000116 |
| C4BPA     | -0.27924 | 4.57E-05 | 0.000117 |
| IL6ST     | -0.2142  | 4.74E-05 | 0.000121 |
| STK11     | -0.14036 | 4.75E-05 | 0.000121 |
| STING1    | 0.122967 | 4.73E-05 | 0.000121 |
| ATP5ME    | -0.11196 | 4.75E-05 | 0.000121 |
| TNFRSF11B | -0.17061 | 4.79E-05 | 0.000121 |
| MAP3K12   | -0.14819 | 4.86E-05 | 0.000123 |
| CACNA1C   | 0.16008  | 5.05E-05 | 0.000127 |
| GPI       | -0.39912 | 5.38E-05 | 0.000135 |
| IDH2      | 0.103414 | 5.93E-05 | 0.000149 |
| GBP4      | 0.210449 | 6.03E-05 | 0.000151 |
| TFDP1     | -0.11404 | 6.04E-05 | 0.000151 |
| LFNG      | 0.236907 | 6.09E-05 | 0.000151 |
| BCL6      | -0.13044 | 6.25E-05 | 0.000155 |
| CDK2      | -0.13179 | 6.45E-05 | 0.00016  |
| C3        | -0.83235 | 6.70E-05 | 0.000165 |
| PIK3R2    | -0.12006 | 6.75E-05 | 0.000166 |
| SPRY4     | 0.243104 | 6.92E-05 | 0.00017  |
| GZMK      | 0.214865 | 7.40E-05 | 0.000181 |
| TWF1      | -0.12207 | 7.41E-05 | 0.000181 |
| GPX4      | -0.10541 | 7.52E-05 | 0.000183 |
| KDM6A     | -0.15781 | 7.67E-05 | 0.000187 |
| SHC1      | -0.28991 | 8.48E-05 | 0.000206 |
| KRT10     | -0.12007 | 8.51E-05 | 0.000206 |
| ID4       | -0.25324 | 8.60E-05 | 0.000208 |
| PSEN1     | -0.13012 | 8.82E-05 | 0.000213 |
| HHEX      | 0.212081 | 9.14E-05 | 0.00022  |
| LY96      | 0.15711  | 9.18E-05 | 0.00022  |

|                  |          |          |          |
|------------------|----------|----------|----------|
| <i>SHC2</i>      | -0.28786 | 9.27E-05 | 0.000222 |
| <i>RIMKLB</i>    | -0.17313 | 1.07E-04 | 0.000256 |
| <i>PYCR2</i>     | -0.1593  | 1.12E-04 | 0.000267 |
| <i>RANBP2</i>    | -0.11221 | 1.13E-04 | 0.000268 |
| <i>ELOB</i>      | -0.11577 | 1.14E-04 | 0.000271 |
| <i>SERPINA1</i>  | 0.908558 | 1.28E-04 | 0.0003   |
| <i>HLA-E</i>     | 0.252519 | 1.28E-04 | 0.0003   |
| <i>PLK1</i>      | -0.14871 | 1.36E-04 | 0.000318 |
| <i>PDGFRA</i>    | 0.27936  | 1.55E-04 | 0.000361 |
| <i>TPSAB1/B2</i> | 0.265569 | 1.56E-04 | 0.000363 |
| <i>SNAI2</i>     | 0.214216 | 1.59E-04 | 0.00037  |
| <i>CXCL10</i>    | 0.282236 | 1.62E-04 | 0.000376 |
| <i>SLC2A1</i>    | -0.46292 | 1.67E-04 | 0.000386 |
| <i>RPS27A</i>    | -0.20312 | 1.72E-04 | 0.000397 |
| <i>SMAP1</i>     | -0.11389 | 1.76E-04 | 0.000406 |
| <i>H3-5</i>      | -0.1828  | 1.83E-04 | 0.00042  |
| <i>TCF3</i>      | -0.1306  | 1.84E-04 | 0.00042  |
| <i>CD40</i>      | 0.175711 | 1.86E-04 | 0.000424 |
| <i>CEBPB</i>     | -0.13001 | 1.86E-04 | 0.000424 |
| <i>TDO2</i>      | 0.324547 | 1.86E-04 | 0.000424 |
| <i>PKM</i>       | -0.19334 | 1.97E-04 | 0.000446 |
| <i>FAP</i>       | 0.378625 | 2.02E-04 | 0.000455 |
| <i>CARD11</i>    | -0.11453 | 2.04E-04 | 0.000459 |
| <i>L1CAM</i>     | -0.27334 | 2.06E-04 | 0.000462 |
| <i>ZEB1</i>      | 0.119228 | 2.14E-04 | 0.00048  |
| <i>HRAS</i>      | -0.11531 | 2.16E-04 | 0.000482 |
| <i>PNMA1</i>     | -0.13133 | 2.29E-04 | 0.000511 |
| <i>ARID2</i>     | -0.11092 | 2.46E-04 | 0.000547 |
| <i>BCL2L1</i>    | -0.11889 | 2.48E-04 | 0.000549 |
| <i>COMP</i>      | 0.314497 | 2.62E-04 | 0.000579 |
| <i>PBX1</i>      | -0.254   | 2.63E-04 | 0.000582 |
| <i>BIRC5</i>     | -0.16724 | 2.67E-04 | 0.000588 |
| <i>SELL</i>      | 0.171086 | 2.67E-04 | 0.000588 |
| <i>MCM2</i>      | -0.12852 | 2.77E-04 | 0.000607 |
| <i>SLC25A1</i>   | -0.16027 | 2.97E-04 | 0.00065  |
| <i>PFKFB3</i>    | 0.199671 | 3.00E-04 | 0.000656 |
| <i>CD58</i>      | 0.250883 | 3.19E-04 | 0.000695 |
| <i>CDC20</i>     | -0.16801 | 3.26E-04 | 0.000709 |
| <i>TBL1XR1</i>   | -0.28654 | 3.40E-04 | 0.000736 |
| <i>RUNX1T1</i>   | 0.172785 | 3.41E-04 | 0.000737 |
| <i>KMT2C</i>     | -0.13206 | 3.50E-04 | 0.000755 |
| <i>NDUFB1</i>    | -0.12332 | 3.56E-04 | 0.000767 |
| <i>CDKN1C</i>    | -0.13547 | 3.62E-04 | 0.000778 |
| <i>KRT17</i>     | -0.32127 | 3.65E-04 | 0.000783 |

|                |          |          |          |
|----------------|----------|----------|----------|
| <i>PRC1</i>    | -0.1268  | 3.68E-04 | 0.000789 |
| <i>DKK1</i>    | -0.23906 | 3.86E-04 | 0.000824 |
| <i>FEN1</i>    | -0.10968 | 4.04E-04 | 0.00086  |
| <i>NFKBIZ</i>  | -0.21488 | 4.04E-04 | 0.00086  |
| <i>HAMP</i>    | 0.167328 | 4.08E-04 | 0.000867 |
| <i>SOCS1</i>   | 0.162203 | 4.13E-04 | 0.000876 |
| <i>CXCL13</i>  | 0.241536 | 4.40E-04 | 0.000931 |
| <i>PPP2R3A</i> | -0.13228 | 4.46E-04 | 0.000942 |
| <i>STAT6</i>   | -0.20663 | 4.59E-04 | 0.000967 |
| <i>PDGFA</i>   | -0.14992 | 4.63E-04 | 0.000973 |
| <i>NBN</i>     | -0.10342 | 4.70E-04 | 0.000986 |
| <i>ATR</i>     | -0.12379 | 4.77E-04 | 0.000999 |
| <i>MMP9</i>    | 0.610445 | 4.83E-04 | 0.00101  |
| <i>ETV1</i>    | 0.232747 | 6.00E-04 | 0.001248 |
| <i>CFI</i>     | -0.33685 | 6.07E-04 | 0.00126  |
| <i>BRD2</i>    | -0.16593 | 6.16E-04 | 0.001278 |
| <i>NDC1</i>    | -0.11083 | 6.39E-04 | 0.001322 |
| <i>TNFAIP6</i> | 0.191442 | 6.49E-04 | 0.00134  |
| <i>TGFB1</i>   | 0.30779  | 6.61E-04 | 0.001359 |
| <i>SPRY2</i>   | -0.10675 | 6.75E-04 | 0.001385 |
| <i>EWSR1</i>   | -0.16085 | 7.33E-04 | 0.001499 |
| <i>ATF2</i>    | -0.12201 | 8.23E-04 | 0.001679 |
| <i>CD3D</i>    | 0.205263 | 8.74E-04 | 0.001774 |
| <i>RGMB</i>    | 0.136516 | 9.10E-04 | 0.001839 |
| <i>DAXX</i>    | -0.10038 | 9.64E-04 | 0.001937 |
| <i>CDKN1A</i>  | -0.23511 | 9.71E-04 | 0.001948 |
| <i>ACVR2A</i>  | -0.11204 | 0.001037 | 0.002072 |
| <i>XCL1/2</i>  | 0.138288 | 0.001139 | 0.002263 |
| <i>CXCL9</i>   | 0.303233 | 0.001152 | 0.002284 |
| <i>SP1</i>     | -0.10355 | 0.001161 | 0.002297 |
| <i>UBE2C</i>   | -0.19705 | 0.00117  | 0.002312 |
| <i>PSEN2</i>   | -0.11302 | 0.001209 | 0.002385 |
| <i>ATRX</i>    | -0.11458 | 0.001245 | 0.002449 |
| <i>RPTOR</i>   | -0.11974 | 0.001266 | 0.002483 |
| <i>RFC4</i>    | -0.11319 | 0.001272 | 0.00249  |
| <i>PIM1</i>    | -0.1942  | 0.001287 | 0.002513 |
| <i>CD69</i>    | 0.186422 | 0.001293 | 0.00252  |
| <i>ST6GAL1</i> | -0.14349 | 0.001321 | 0.002571 |
| <i>LRP5</i>    | -0.16038 | 0.001351 | 0.002625 |
| <i>HLA-DOB</i> | 0.14753  | 0.001377 | 0.002666 |
| <i>CREBBP</i>  | -0.13323 | 0.001395 | 0.002694 |
| <i>SOD2</i>    | -0.48593 | 0.001457 | 0.002809 |
| <i>ATP5F1D</i> | -0.12677 | 0.001515 | 0.002916 |
| <i>TYMS</i>    | -0.19123 | 0.001521 | 0.002923 |

|                 |          |          |          |
|-----------------|----------|----------|----------|
| <i>P2RY13</i>   | 0.143491 | 0.001531 | 0.002936 |
| <i>MMP11</i>    | 0.239085 | 0.001536 | 0.002936 |
| <i>OAS2</i>     | 0.186292 | 0.001537 | 0.002936 |
| <i>CD209</i>    | 0.207617 | 0.00157  | 0.002983 |
| <i>GSK3B</i>    | -0.10419 | 0.001568 | 0.002983 |
| <i>MME</i>      | -0.30236 | 0.001566 | 0.002983 |
| <i>IL15RA</i>   | 0.130705 | 0.001649 | 0.003129 |
| <i>RELA</i>     | -0.14096 | 0.001693 | 0.003205 |
| <i>CACNA2D1</i> | 0.117009 | 0.00183  | 0.003446 |
| <i>IRS1</i>     | 0.171293 | 0.001848 | 0.003467 |
| <i>LTBP1</i>    | 0.294029 | 0.001879 | 0.003519 |
| <i>RSAD2</i>    | 0.151042 | 0.001886 | 0.003527 |
| <i>PIK3R1</i>   | 0.129889 | 0.001926 | 0.003595 |
| <i>HLA-B</i>    | 0.35059  | 0.002007 | 0.003739 |
| <i>SLAMF6</i>   | 0.138186 | 0.002106 | 0.003918 |
| <i>DAB2</i>     | 0.171392 | 0.002346 | 0.004355 |
| <i>ELK1</i>     | -0.10408 | 0.002648 | 0.004882 |
| <i>CD22</i>     | -0.14605 | 0.002708 | 0.004984 |
| <i>COL5A2</i>   | 0.154931 | 0.002718 | 0.004994 |
| <i>IGF1</i>     | 0.182797 | 0.002752 | 0.005047 |
| <i>RORA</i>     | 0.17271  | 0.002764 | 0.005061 |
| <i>TSPAN7</i>   | -0.10276 | 0.002951 | 0.005393 |
| <i>NFATC4</i>   | 0.149101 | 0.003007 | 0.005487 |
| <i>HES1</i>     | -0.13628 | 0.003016 | 0.005493 |
| <i>TNFSF10</i>  | 0.234891 | 0.003241 | 0.005883 |
| <i>NR3C1</i>    | 0.15955  | 0.003661 | 0.006598 |
| <i>BCAT1</i>    | -0.23775 | 0.003693 | 0.006645 |
| <i>MAPK12</i>   | -0.11939 | 0.003958 | 0.007109 |
| <i>CD44</i>     | -0.20376 | 0.003998 | 0.00717  |
| <i>P4HA2</i>    | -0.16101 | 0.004219 | 0.00754  |
| <i>SBNO2</i>    | -0.1559  | 0.00425  | 0.007582 |
| <i>CFD</i>      | 0.161861 | 0.004295 | 0.007648 |
| <i>H3C8</i>     | -0.1983  | 0.004576 | 0.008122 |
| <i>NR4A1</i>    | 0.21909  | 0.005001 | 0.008831 |
| <i>OAT</i>      | -0.11005 | 0.005144 | 0.009069 |
| <i>ARID1B</i>   | -0.13224 | 0.005264 | 0.009265 |
| <i>H3C2</i>     | -0.27805 | 0.005275 | 0.009269 |
| <i>FGF2</i>     | -0.13509 | 0.005288 | 0.009276 |
| <i>DTX3</i>     | -0.13446 | 0.005405 | 0.009449 |
| <i>TAP1</i>     | -0.18067 | 0.006017 | 0.010468 |
| <i>SERPING1</i> | -0.33819 | 0.006251 | 0.010838 |
| <i>H3-3A</i>    | -0.19066 | 0.006268 | 0.01085  |
| <i>DDIT4</i>    | 0.203269 | 0.006388 | 0.01104  |
| <i>DDB2</i>     | -0.11316 | 0.006463 | 0.011132 |



|                 |          |          |          |
|-----------------|----------|----------|----------|
| <i>HLA-DPB1</i> | 0.166026 | 0.006656 | 0.011427 |
| <i>FOXM1</i>    | -0.12879 | 0.006649 | 0.011427 |
| <i>OAS1</i>     | 0.153971 | 0.007817 | 0.01329  |
| <i>TNFSF14</i>  | -0.18377 | 0.007842 | 0.013312 |
| <i>DGLUCY</i>   | -0.11095 | 0.007898 | 0.013384 |
| <i>EGR1</i>     | 0.343399 | 0.007934 | 0.013423 |
| <i>DEPTOR</i>   | 0.150232 | 0.008384 | 0.01414  |
| <i>PSMB5</i>    | -0.14496 | 0.008501 | 0.014291 |
| <i>CCL18</i>    | 0.239631 | 0.008761 | 0.014705 |
| <i>MYBL2</i>    | -0.17256 | 0.008911 | 0.014885 |
| <i>MXI1</i>     | -0.14292 | 0.008893 | 0.014885 |
| <i>JUNB</i>     | 0.297041 | 0.009411 | 0.01567  |
| <i>SERINC5</i>  | -0.16093 | 0.010863 | 0.017974 |
| <i>MARCO</i>    | 0.168362 | 0.010918 | 0.018037 |
| <i>FZD4</i>     | 0.140201 | 0.01113  | 0.018358 |
| <i>MAPK14</i>   | -0.10431 | 0.01225  | 0.020078 |
| <i>SMO</i>      | -0.13889 | 0.012277 | 0.020091 |
| <i>STAT2</i>    | -0.11699 | 0.012471 | 0.020314 |
| <i>CCL2</i>     | 0.233028 | 0.012528 | 0.020375 |
| <i>SPP1</i>     | 0.556547 | 0.013807 | 0.022385 |
| <i>JAG1</i>     | 0.218975 | 0.014322 | 0.023149 |
| <i>PCK1</i>     | -0.1968  | 0.014867 | 0.023957 |
| <i>RAB7A</i>    | -0.10096 | 0.015134 | 0.024349 |
| <i>IER3</i>     | 0.169431 | 0.015318 | 0.024608 |
| <i>SF3B1</i>    | -0.13482 | 0.015632 | 0.025073 |
| <i>NLRP3</i>    | 0.121291 | 0.015701 | 0.025145 |
| <i>CXCL2</i>    | 0.173123 | 0.015831 | 0.025315 |
| <i>IDH1</i>     | 0.112115 | 0.017155 | 0.027266 |
| <i>POU2AF1</i>  | 0.139312 | 0.018255 | 0.028839 |
| <i>IL33</i>     | 0.152226 | 0.019245 | 0.030266 |
| <i>ENO1</i>     | -0.12966 | 0.019349 | 0.030385 |
| <i>NOS3</i>     | 0.151361 | 0.019689 | 0.030827 |
| <i>HELLS</i>    | -0.11028 | 0.019953 | 0.031193 |
| <i>CD5</i>      | 0.116861 | 0.020487 | 0.031886 |
| <i>AMH</i>      | -0.12491 | 0.020794 | 0.032219 |
| <i>CLEC5A</i>   | 0.174335 | 0.021799 | 0.03348  |
| <i>AXL</i>      | -0.19686 | 0.02252  | 0.034487 |
| <i>FZD1</i>     | -0.19589 | 0.023132 | 0.035372 |
| <i>KDR</i>      | -0.16461 | 0.023184 | 0.035386 |
| <i>TNFRSF25</i> | 0.106914 | 0.025722 | 0.039162 |
| <i>DUSP1</i>    | -0.33872 | 0.026359 | 0.040015 |
| <i>CXCL14</i>   | 0.203815 | 0.026906 | 0.040728 |
| <i>ABL1</i>     | -0.17153 | 0.027472 | 0.041431 |
| <i>CCL15</i>    | 0.223177 | 0.027489 | 0.041431 |

|               |          |          |          |
|---------------|----------|----------|----------|
| <i>SFRP1</i>  | 0.15676  | 0.027949 | 0.041824 |
| <i>GDF6</i>   | -0.11601 | 0.029467 | 0.043882 |
| <i>LGR5</i>   | 0.150877 | 0.029988 | 0.044431 |
| <i>HSPB1</i>  | -0.12121 | 0.030149 | 0.044607 |
| <i>BNIP3</i>  | -0.16791 | 0.030259 | 0.044707 |
| <i>MYCT1</i>  | 0.145242 | 0.030709 | 0.045308 |
| <i>IFITM2</i> | -0.26886 | 0.031233 | 0.045823 |
| <i>RPS6</i>   | -0.29715 | 0.031573 | 0.046258 |
| <i>MKI67</i>  | -0.15588 | 0.03251  | 0.047431 |
| <i>IL32</i>   | 0.176961 | 0.033709 | 0.048975 |

Supplementary Table 2: list of GO categories (S-AOIs vs E-AOIs)

|                             | GO-BIOLOGICAL PROCESS                                     | FRACTION OF GENES | ADJUSTED PVALUE |
|-----------------------------|-----------------------------------------------------------|-------------------|-----------------|
| <b>GENES UP IN S vs E</b>   | cytokine-mediated signaling pathway                       | 83/621            | 4.17E-57        |
|                             | cellular response to cytokine stimulus                    | 61/482            | 3.03E-39        |
|                             | inflammatory response                                     | 41/230            | 1.20E-31        |
|                             | cellular response to interferon-gamma                     | 33/121            | 1.20E-31        |
|                             | cellular response to oxygen-containing compound           | 28/323            | 2.99E-13        |
|                             | extracellular matrix organization                         | 27/300            | 3.52E-13        |
|                             | positive regulation of cell migration                     | 24/269            | 1.18E-11        |
|                             | positive regulation of cell motility                      | 22/221            | 1.32E-11        |
|                             | regulation of cell migration                              | 28/408            | 5.74E-11        |
|                             | regulation of angiogenesis                                | 18/203            | 8.01E-09        |
|                             | positive regulation of transcription, DNA-templated       | 44/1183           | 1.23E-08        |
|                             | positive regulation of vasculature development            | 13/102            | 2.73E-08        |
|                             | positive regulation of transcription by RNA polymerase II | 34/908            | 7.88E-07        |
|                             | cell-matrix adhesion                                      | 10/100            | 1.17E-05        |
|                             | extracellular matrix disassembly                          | 6/66              | 0.0014          |
| <b>GENES DOWN IN S vs E</b> | regulation of apoptotic process                           | 64/742            | 8.18E-23        |
|                             | regulation of programmed cell death                       | 46/381            | 7.35E-22        |
|                             | regulation of cell population proliferation               | 57/764            | 1.18E-17        |
|                             | mitochondrial ATP synthesis coupled electron transport    | 16/71             | 1.29E-11        |
|                             | mitochondrial electron transport, NADH to ubiquinone      | 11/39             | 4.38E-09        |
|                             | regulation of mitotic cell cycle                          | 20/178            | 4.89E-09        |
|                             | regulation of cell differentiation                        | 23/258            | 1.75E-08        |
|                             | regulation of mitotic cell cycle phase transition         | 17/188            | 1.80E-06        |
|                             | mitotic cell cycle phase transition                       | 17/209            | 6.63E-06        |
|                             | regulation of cell adhesion                               | 13/133            | 1.85E-05        |
|                             | morphogenesis of an epithelial                            | 8/44              | 2.19E-05        |
|                             | apoptotic mitochondrial changes                           | 7/33              | 3.40E-05        |
|                             | regulation of cell adhesion                               | 9/80              | 1.89E-04        |

|                                                        |        |          |
|--------------------------------------------------------|--------|----------|
| cellular response to oxidative stress                  | 11/125 | 2.17E-04 |
| epidermal cell differentiation                         | 7/53   | 5.17E-04 |
| oxidative stress-induced apoptotic signaling pathway   | 4/18   | 0.0021   |
| positive regulation of epithelial cell differentiation | 4/20   | 0.0029   |

Supplementary Table 3: Full list of differentially expressed genes in pS-AOIs vs pE AOIs

| <b>Target name</b> | <b>Log2 Fold Change (pS-AOIs/pE-AOIs)</b> | <b>Pvalue</b> | <b>Adjusted pvalue</b> |
|--------------------|-------------------------------------------|---------------|------------------------|
| CD9                | -0.7121                                   | 5.78E-07      | 0.000606               |
| KRT19              | -2.21512                                  | 2.94E-06      | 0.00108                |
| ZEB2               | 0.567412                                  | 3.12E-06      | 0.00108                |
| NRP1               | 0.560456                                  | 4.51E-06      | 0.00108                |
| TGFB2              | -1.71604                                  | 5.15E-06      | 0.00108                |
| ABL1               | -0.47597                                  | 7.16E-06      | 0.001131               |
| ALCAM              | -1.37571                                  | 9.11E-06      | 0.001131               |
| ITGB4              | -0.52457                                  | 9.70E-06      | 0.001131               |
| PSMB7              | -0.44332                                  | 9.67E-06      | 0.001131               |
| ITGA3              | -0.708                                    | 1.54E-05      | 0.001616               |
| PDGFRB             | 0.386086                                  | 1.90E-05      | 0.00181                |
| KRT17              | 0.105967                                  | 2.22E-05      | 0.001848               |
| C4B                | -2.54173                                  | 2.29E-05      | 0.001848               |
| MUC1               | -0.74713                                  | 3.13E-05      | 0.002192               |
| IL1R1              | 0.133191                                  | 5.60E-05      | 0.003454               |
| MS4A6A             | 0.824062                                  | 5.38E-05      | 0.003454               |
| MIF                | -0.8078                                   | 6.54E-05      | 0.003813               |
| COL6A3             | 2.38131                                   | 8.21E-05      | 0.004534               |
| SFXN1              | -0.25399                                  | 9.52E-05      | 0.004992               |
| RPL7A              | -0.92139                                  | 0.000102      | 0.005084               |
| GLS                | -1.16076                                  | 0.000108      | 0.005156               |
| LAMA5              | -1.43205                                  | 0.000127      | 0.005807               |
| GMIP               | 0.216553                                  | 0.00014       | 0.00613                |
| HHIP               | -1.2952                                   | 0.000146      | 0.006139               |
| HLA-DPA1           | 0.89495                                   | 0.000162      | 0.00645                |
| KRT18              | -2.15803                                  | 0.000166      | 0.00645                |
| NFE2L2             | -0.27149                                  | 0.000192      | 0.00709                |
| CDH3               | -0.66459                                  | 0.000196      | 0.00709                |
| CFB                | -1.27931                                  | 0.00021       | 0.007207               |

|                 |          |          |          |
|-----------------|----------|----------|----------|
| <i>ITGA4</i>    | 0.428465 | 0.000229 | 0.007207 |
| <i>CD53</i>     | 0.849941 | 0.000234 | 0.007207 |
| <i>CTSS</i>     | 0.799561 | 0.00023  | 0.007207 |
| <i>PLOD2</i>    | -1.47426 | 0.000224 | 0.007207 |
| <i>ENG</i>      | 0.583545 | 0.000271 | 0.008121 |
| <i>IL33</i>     | 0.265983 | 0.000288 | 0.008395 |
| <i>FGF9</i>     | -0.55751 | 0.000304 | 0.008617 |
| <i>CIC</i>      | -0.33946 | 0.000325 | 0.00898  |
| <i>LCP1</i>     | 0.952195 | 0.000343 | 0.009219 |
| <i>THY1</i>     | 0.90332  | 0.000419 | 0.01098  |
| <i>SOCS1</i>    | 0.4133   | 0.000431 | 0.011032 |
| <i>TNFSF10</i>  | 0.676232 | 0.000462 | 0.011536 |
| <i>COX5B</i>    | -0.2953  | 0.000498 | 0.012146 |
| <i>CD4</i>      | 0.785785 | 0.000547 | 0.013047 |
| <i>HLA-DRB</i>  | 1.394209 | 0.000723 | 0.01549  |
| <i>CD81</i>     | -0.65648 | 0.00069  | 0.01549  |
| <i>NUP107</i>   | -0.30659 | 0.000691 | 0.01549  |
| <i>C1QB</i>     | 0.879413 | 0.000715 | 0.01549  |
| <i>ALDOA</i>    | -0.46929 | 0.000724 | 0.01549  |
| <i>GPI</i>      | -0.38842 | 0.000744 | 0.015613 |
| <i>IL32</i>     | 1.186843 | 0.000828 | 0.017031 |
| <i>PECAM1</i>   | 0.423698 | 0.000863 | 0.017409 |
| <i>HLA-DRA</i>  | 1.554849 | 0.000883 | 0.017482 |
| <i>CD63</i>     | 0.308092 | 0.000924 | 0.017849 |
| <i>FCER1G</i>   | 0.758319 | 0.000936 | 0.017849 |
| <i>API5</i>     | -0.2895  | 0.000955 | 0.017885 |
| <i>WT1</i>      | -0.41709 | 0.000983 | 0.018093 |
| <i>ETS1</i>     | 0.544085 | 0.001039 | 0.018275 |
| <i>TYMP</i>     | 0.746784 | 0.001141 | 0.019613 |
| <i>CD74</i>     | 1.633992 | 0.001199 | 0.020283 |
| <i>C1QA</i>     | 1.059668 | 0.00123  | 0.020488 |
| <i>JAK3</i>     | 0.570569 | 0.001401 | 0.02193  |
| <i>C7</i>       | 0.621166 | 0.00137  | 0.02193  |
| <i>HLA-DQA1</i> | 0.720239 | 0.001371 | 0.02193  |
| <i>MAP3K20</i>  | -0.80192 | 0.001386 | 0.02193  |
| <i>CXADR</i>    | -0.60434 | 0.001425 | 0.02198  |
| <i>PRDX5</i>    | -0.36382 | 0.001459 | 0.021986 |
| <i>FGF18</i>    | -0.50938 | 0.001467 | 0.021986 |
| <i>SMAD3</i>    | -0.53784 | 0.001489 | 0.021994 |
| <i>CXCL12</i>   | 1.021535 | 0.001597 | 0.023039 |
| <i>ANP32B</i>   | -0.54361 | 0.001603 | 0.023039 |
| <i>GBP4</i>     | 0.482947 | 0.001652 | 0.023421 |
| <i>CSF1</i>     | 0.509754 | 0.00168  | 0.023493 |
| <i>GIMAP4</i>   | 0.641213 | 0.001712 | 0.023628 |

|         |          |          |          |
|---------|----------|----------|----------|
| LAMP1   | 0.329204 | 0.001799 | 0.024505 |
| IGF1R   | -0.1378  | 0.001884 | 0.025331 |
| PCK1    | -0.53454 | 0.001936 | 0.025708 |
| CCND2   | 0.62909  | 0.002009 | 0.026348 |
| ANXA1   | -0.31186 | 0.002045 | 0.026489 |
| RPL23   | -0.59317 | 0.00211  | 0.026987 |
| NLRC5   | 0.504206 | 0.002245 | 0.028372 |
| GBP1    | 0.447898 | 0.002359 | 0.029119 |
| MCAM    | 0.364252 | 0.002358 | 0.029119 |
| SREBF1  | -0.1063  | 0.002405 | 0.029337 |
| VCAN    | 1.486343 | 0.002445 | 0.029477 |
| HLA-DMB | 0.787171 | 0.002654 | 0.02982  |
| PDPN    | -0.21102 | 0.002672 | 0.02982  |
| CYBB    | 0.788057 | 0.002529 | 0.02982  |
| TECR    | 0.342523 | 0.002574 | 0.02982  |
| IFITM2  | -0.92127 | 0.002615 | 0.02982  |
| CARD11  | -0.18141 | 0.002664 | 0.02982  |
| CD68    | 1.003557 | 0.002605 | 0.02982  |
| RPS27A  | -0.36181 | 0.002814 | 0.031071 |
| IFNGR2  | 0.380294 | 0.002901 | 0.0317   |
| CD200   | -0.68927 | 0.003026 | 0.032388 |
| CD84    | 0.503753 | 0.003003 | 0.032388 |
| HLA-B   | 1.446477 | 0.003146 | 0.032998 |
| WIPF1   | 0.533989 | 0.003129 | 0.032998 |
| PIK3CD  | 0.377819 | 0.003244 | 0.033689 |
| PTPRC   | 0.845836 | 0.003324 | 0.034188 |
| SPP1    | -0.57925 | 0.003655 | 0.03722  |
| BRD3    | -0.46792 | 0.003866 | 0.03899  |
| TFRC    | -0.58594 | 0.003919 | 0.03907  |
| NECTIN2 | -0.63782 | 0.003948 | 0.03907  |
| FCGR1A  | 0.699172 | 0.004247 | 0.041634 |
| IFI27   | -0.14019 | 0.004287 | 0.041644 |
| MET     | -0.77898 | 0.004511 | 0.043409 |
| CD3D    | 0.486173 | 0.00459  | 0.043775 |
| TRBC1/2 | 1.1333   | 0.004644 | 0.04389  |
| HSPB1   | 0.233773 | 0.004782 | 0.044792 |
| SLC16A1 | -0.24404 | 0.004909 | 0.045571 |
| GPSM3   | 0.467942 | 0.005086 | 0.046798 |
| DNMT1   | 0.130718 | 0.005502 | 0.048911 |
| ITGB2   | 0.679288 | 0.005453 | 0.048911 |
| IRF8    | 0.49282  | 0.005422 | 0.048911 |
| CDH2    | -0.37247 | 0.005492 | 0.048911 |
| COL27A1 | -0.1501  | 0.005578 | 0.04917  |

Supplementary Table 4: list of GO categories (pS-AOIs vs pE-AOIs)

|                               | GO-BIOLOGICAL PROCESS                                     | FRACTION OF GENES | ADJUSTED PVALUE |
|-------------------------------|-----------------------------------------------------------|-------------------|-----------------|
| <b>GENES UP IN pS vs pE</b>   | cytokine-mediated signaling pathway                       | 20/621            | 9.80E-13        |
|                               | cellular response to interferon-gamma                     | 9/121             | 3.59E-08        |
|                               | cellular response to cytokine stimulus                    | 14/482            | 3.71E-08        |
|                               | T cell receptor signaling pathway                         | 8/158             | 3.41E-06        |
|                               | cell-matrix adhesion                                      | 4/100             | 0.0038          |
|                               | positive regulation of angiogenesis                       | 3/116             | 0.031           |
| <b>GENES DOWN IN pS vs pE</b> | negative regulation of programmed cell death              | 11/381            | 6.90E-06        |
|                               | cell-cell junction organization                           | 6/82              | 3.49E-05        |
|                               | cell-cell adhesion via plasma-membrane adhesion molecules | 6/170             | 7.58E-04        |
|                               | regulation of cell population proliferation               | 10/764            | 0.0021          |
|                               | epithelial cell differentiation                           | 3/101             | 0.024           |
|                               | cellular response to oxidative stress                     | 3/125             | 0.037           |

Supplementary Table 5: Full list of differentially expressed genes in tS-AOIs vs tE AOIs

| <i>Target name</i> | <i>Log2 Fold Change (tS-AOIs/tE-AOIs)</i> | <i>Pvalue</i> | <i>Adjusted pvalue</i> |
|--------------------|-------------------------------------------|---------------|------------------------|
| <i>CSF1R</i>       | 1.10914                                   | 2.42E-39      | 2.54E-36               |
| <i>FCGR3A/B</i>    | 1.153437                                  | 5.45E-38      | 2.86E-35               |
| <i>A2M</i>         | 1.408031                                  | 1.39E-36      | 3.82E-34               |
| <i>CTSS</i>        | 0.964824                                  | 1.46E-36      | 3.82E-34               |
| <i>HLA-DMB</i>     | 0.859538                                  | 2.10E-36      | 4.41E-34               |
| <i>HLA-DMA</i>     | 0.857178                                  | 5.00E-36      | 8.75E-34               |
| <i>C1QA</i>        | 1.465104                                  | 2.79E-34      | 4.18E-32               |
| <i>HLA-DRB</i>     | 1.511025                                  | 4.42E-34      | 5.80E-32               |
| <i>C1QB</i>        | 1.326793                                  | 5.32E-34      | 6.20E-32               |
| <i>WIPF1</i>       | 0.553683                                  | 1.01E-33      | 1.05E-31               |
| <i>FCER1G</i>      | 0.907124                                  | 1.16E-33      | 1.11E-31               |
| <i>ENG</i>         | 1.036452                                  | 2.66E-33      | 2.32E-31               |
| <i>HLA-DRA</i>     | 1.522005                                  | 4.27E-33      | 3.44E-31               |
| <i>HLA-DPA1</i>    | 0.887067                                  | 2.49E-32      | 1.87E-30               |
| <i>ITGB2</i>       | 0.773146                                  | 5.11E-32      | 3.57E-30               |
| <i>FGCR2A/B</i>    | 1.174236                                  | 7.80E-32      | 5.11E-30               |
| <i>PECAM1</i>      | 0.935411                                  | 1.18E-31      | 7.29E-30               |
| <i>CD14</i>        | 1.222408                                  | 1.93E-31      | 1.12E-29               |

|                 |          |          |          |
|-----------------|----------|----------|----------|
| <i>ITGA3</i>    | -1.20197 | 2.27E-30 | 1.25E-28 |
| <i>CD4</i>      | 0.823755 | 7.53E-30 | 3.95E-28 |
| <i>MS4A6A</i>   | 0.893596 | 8.10E-30 | 4.04E-28 |
| <i>CYBB</i>     | 0.898197 | 1.19E-29 | 5.65E-28 |
| <i>HLA-DRB3</i> | 1.051696 | 2.31E-29 | 1.05E-27 |
| <i>LCP1</i>     | 0.755256 | 2.03E-28 | 8.89E-27 |
| <i>CD53</i>     | 0.778913 | 3.56E-28 | 1.49E-26 |
| <i>LAIR1</i>    | 0.680223 | 4.30E-28 | 1.73E-26 |
| <i>CD74</i>     | 1.724037 | 4.85E-28 | 1.88E-26 |
| <i>HLA-DQA1</i> | 0.788391 | 2.67E-27 | 9.98E-26 |
| <i>ZEB2</i>     | 0.643603 | 1.31E-26 | 4.74E-25 |
| <i>LAMA5</i>    | -1.06907 | 6.04E-25 | 2.11E-23 |
| <i>PTPRC</i>    | 0.762855 | 1.04E-24 | 3.50E-23 |
| <i>CD163</i>    | 0.915364 | 1.78E-24 | 5.49E-23 |
| <i>LYZ</i>      | 1.3319   | 1.72E-24 | 5.49E-23 |
| <i>GIMAP4</i>   | 0.649961 | 1.75E-24 | 5.49E-23 |
| <i>TNFRSF1B</i> | 0.563233 | 7.95E-24 | 2.38E-22 |
| <i>KRT18</i>    | -1.55351 | 9.15E-24 | 2.67E-22 |
| <i>LILRB4</i>   | 0.639777 | 1.09E-23 | 3.10E-22 |
| <i>IL10RA</i>   | 0.641259 | 2.44E-23 | 6.72E-22 |
| <i>FCGR1A</i>   | 0.689691 | 4.37E-23 | 1.18E-21 |
| <i>CXCL16</i>   | 0.455362 | 1.12E-22 | 2.95E-21 |
| <i>TBXAS1</i>   | 0.559124 | 3.54E-22 | 9.05E-21 |
| <i>PRKDC</i>    | -0.35824 | 4.30E-22 | 1.07E-20 |
| <i>C3AR1</i>    | 0.587337 | 2.14E-21 | 5.21E-20 |
| <i>EPHA2</i>    | -0.52364 | 2.64E-21 | 6.29E-20 |
| <i>HLA-DRB4</i> | 0.79993  | 4.68E-21 | 1.09E-19 |
| <i>FPR3</i>     | 0.464175 | 6.32E-21 | 1.44E-19 |
| <i>CLEC7A</i>   | 0.606788 | 7.16E-21 | 1.60E-19 |
| <i>SPRED1</i>   | 0.415766 | 7.90E-21 | 1.73E-19 |
| <i>KRT19</i>    | -1.52624 | 9.27E-21 | 1.98E-19 |
| <i>MS4A4A</i>   | 0.606814 | 2.00E-20 | 4.19E-19 |
| <i>ITGB4</i>    | -0.93642 | 2.04E-20 | 4.19E-19 |
| <i>CD37</i>     | 0.515784 | 2.82E-20 | 5.68E-19 |
| <i>LAMC2</i>    | -0.86581 | 3.94E-20 | 7.81E-19 |
| <i>HLA-DOA</i>  | 0.552108 | 4.56E-20 | 8.86E-19 |
| <i>LGALS9</i>   | 0.607422 | 1.89E-19 | 3.61E-18 |
| <i>CD68</i>     | 0.751857 | 6.00E-19 | 1.12E-17 |
| <i>CD84</i>     | 0.447495 | 7.25E-19 | 1.33E-17 |
| <i>TLR1</i>     | 0.436588 | 1.35E-18 | 2.44E-17 |
| <i>CDH2</i>     | -0.68879 | 1.94E-18 | 3.46E-17 |
| <i>CD9</i>      | -0.65144 | 3.12E-18 | 5.46E-17 |
| <i>PPL</i>      | -0.60038 | 3.68E-18 | 6.33E-17 |
| <i>NCF4</i>     | 0.498891 | 6.93E-18 | 1.17E-16 |



|                |          |          |          |
|----------------|----------|----------|----------|
| <i>INPP5D</i>  | 0.491371 | 7.06E-18 | 1.17E-16 |
| <i>ITGA1</i>   | 0.694361 | 1.40E-17 | 2.26E-16 |
| <i>MRC1</i>    | 0.73359  | 1.40E-17 | 2.26E-16 |
| <i>CD34</i>    | 0.537159 | 1.70E-17 | 2.70E-16 |
| <i>MET</i>     | -0.67194 | 5.16E-17 | 8.08E-16 |
| <i>FSTL3</i>   | -0.66675 | 5.65E-17 | 8.71E-16 |
| <i>DSP</i>     | -0.62615 | 6.87E-17 | 1.04E-15 |
| <i>CFB</i>     | -1.2262  | 7.67E-17 | 1.13E-15 |
| <i>IGF1R</i>   | -0.50756 | 7.59E-17 | 1.13E-15 |
| <i>FPR1</i>    | 0.426982 | 9.02E-17 | 1.31E-15 |
| <i>HAVCR2</i>  | 0.411101 | 2.18E-16 | 3.13E-15 |
| <i>HCK</i>     | 0.433541 | 4.00E-16 | 5.68E-15 |
| <i>PDGFRB</i>  | 0.89574  | 4.74E-16 | 6.63E-15 |
| <i>TLR2</i>    | 0.463847 | 1.03E-15 | 1.42E-14 |
| <i>GIMAP6</i>  | 0.438975 | 1.57E-15 | 2.14E-14 |
| <i>GMIP</i>    | 0.301947 | 1.64E-15 | 2.21E-14 |
| <i>SAMSN1</i>  | 0.469576 | 2.07E-15 | 2.74E-14 |
| <i>THY1</i>    | 0.63317  | 4.37E-15 | 5.73E-14 |
| <i>CSF3R</i>   | 0.413956 | 7.10E-15 | 9.19E-14 |
| <i>CXCL12</i>  | 0.535564 | 8.65E-15 | 1.11E-13 |
| <i>FLNC</i>    | -0.65732 | 9.18E-15 | 1.16E-13 |
| <i>SMARCA4</i> | -0.31895 | 9.60E-15 | 1.20E-13 |
| <i>TNFSF12</i> | 0.346444 | 1.21E-14 | 1.49E-13 |
| <i>SLC39A6</i> | -0.2435  | 1.27E-14 | 1.54E-13 |
| <i>F13A1</i>   | 0.875524 | 1.31E-14 | 1.58E-13 |
| <i>SFRP2</i>   | 0.972489 | 1.34E-14 | 1.60E-13 |
| <i>COL6A3</i>  | 1.245364 | 1.46E-14 | 1.71E-13 |
| <i>NID2</i>    | 0.586004 | 1.47E-14 | 1.71E-13 |
| <i>HSP90B1</i> | -0.57464 | 2.18E-14 | 2.51E-13 |
| <i>ITGAX</i>   | 0.443284 | 2.24E-14 | 2.55E-13 |
| <i>FZD6</i>    | -0.31945 | 2.39E-14 | 2.69E-13 |
| <i>JAK3</i>    | 0.432649 | 2.44E-14 | 2.72E-13 |
| <i>RASA4</i>   | 0.360224 | 2.47E-14 | 2.73E-13 |
| <i>COX6A1</i>  | -0.36482 | 2.75E-14 | 3.01E-13 |
| <i>TP53</i>    | -0.31337 | 3.07E-14 | 3.32E-13 |
| <i>CXADR</i>   | -0.3978  | 5.34E-14 | 5.71E-13 |
| <i>IRF8</i>    | 0.477844 | 8.85E-14 | 9.38E-13 |
| <i>SIGLEC1</i> | 0.493679 | 9.21E-14 | 9.66E-13 |
| <i>MSR1</i>    | 0.451595 | 1.12E-13 | 1.16E-12 |
| <i>SYK</i>     | 0.391625 | 1.39E-13 | 1.43E-12 |
| <i>PTGER4</i>  | 0.360206 | 1.41E-13 | 1.43E-12 |
| <i>FCGRT</i>   | 0.352675 | 1.91E-13 | 1.92E-12 |
| <i>ITGA4</i>   | 0.388346 | 2.39E-13 | 2.39E-12 |
| <i>SFRP4</i>   | 0.693202 | 2.63E-13 | 2.61E-12 |

|                 |          |          |          |
|-----------------|----------|----------|----------|
| <i>ACTA2</i>    | 0.788018 | 3.15E-13 | 3.09E-12 |
| <i>HLA-DQB1</i> | 0.4149   | 4.66E-13 | 4.53E-12 |
| <i>FGF9</i>     | -0.46617 | 6.18E-13 | 5.95E-12 |
| <i>LILRB1</i>   | 0.37341  | 6.83E-13 | 6.51E-12 |
| <i>TREM2</i>    | 0.399659 | 7.06E-13 | 6.67E-12 |
| <i>GPSM3</i>    | 0.327271 | 7.46E-13 | 6.99E-12 |
| <i>GLS</i>      | -0.53429 | 9.04E-13 | 8.39E-12 |
| <i>MCAM</i>     | 0.584475 | 9.29E-13 | 8.55E-12 |
| <i>CAPN2</i>    | -0.41126 | 1.14E-12 | 1.03E-11 |
| <i>RAC2</i>     | 0.406327 | 1.14E-12 | 1.03E-11 |
| <i>LY6E</i>     | -0.52372 | 1.42E-12 | 1.27E-11 |
| <i>C5AR1</i>    | 0.381977 | 1.57E-12 | 1.40E-11 |
| <i>S100A9</i>   | 0.723128 | 1.83E-12 | 1.61E-11 |
| <i>NOTCH2</i>   | -0.34221 | 2.27E-12 | 1.99E-11 |
| <i>MERTK</i>    | 0.358646 | 2.36E-12 | 2.05E-11 |
| <i>ELMO1</i>    | 0.361084 | 3.26E-12 | 2.80E-11 |
| <i>CDH5</i>     | 0.455242 | 3.50E-12 | 2.99E-11 |
| <i>ITGAM</i>    | 0.425842 | 4.61E-12 | 3.85E-11 |
| <i>ILF3</i>     | -0.33293 | 4.63E-12 | 3.85E-11 |
| <i>TLR4</i>     | 0.376632 | 4.60E-12 | 3.85E-11 |
| <i>JAML</i>     | 0.481838 | 6.22E-12 | 5.14E-11 |
| <i>PSMB10</i>   | 0.273381 | 8.05E-12 | 6.60E-11 |
| <i>CD36</i>     | 0.458652 | 1.42E-11 | 1.15E-10 |
| <i>C7</i>       | 0.948297 | 1.83E-11 | 1.47E-10 |
| <i>ITGAL</i>    | 0.398233 | 2.10E-11 | 1.68E-10 |
| <i>ATP2A2</i>   | -0.30873 | 2.22E-11 | 1.77E-10 |
| <i>LYN</i>      | 0.279508 | 2.46E-11 | 1.94E-10 |
| <i>OLFML2B</i>  | 0.545158 | 2.58E-11 | 2.02E-10 |
| <i>NRP1</i>     | 0.600464 | 3.02E-11 | 2.35E-10 |
| <i>IFNGR2</i>   | 0.303908 | 3.12E-11 | 2.40E-10 |
| <i>PRDM1</i>    | 0.365617 | 3.59E-11 | 2.75E-10 |
| <i>LILRB2</i>   | 0.548701 | 4.01E-11 | 3.05E-10 |
| <i>ERBB2</i>    | -0.29089 | 4.37E-11 | 3.30E-10 |
| <i>SLC16A1</i>  | -0.52694 | 5.11E-11 | 3.83E-10 |
| <i>C1S</i>      | -0.67934 | 5.61E-11 | 4.17E-10 |
| <i>RB1</i>      | 0.193921 | 5.79E-11 | 4.28E-10 |
| <i>EFNA1</i>    | -0.37609 | 8.61E-11 | 6.31E-10 |
| <i>CCL3/L1</i>  | 0.464743 | 8.90E-11 | 6.48E-10 |
| <i>MUC1</i>     | -0.46739 | 9.62E-11 | 6.96E-10 |
| <i>SKP2</i>     | -0.29517 | 1.31E-10 | 9.40E-10 |
| <i>CMKLR1</i>   | 0.372886 | 1.35E-10 | 9.65E-10 |
| <i>TRAC</i>     | 0.416815 | 1.60E-10 | 1.13E-09 |
| <i>EGFR</i>     | -0.53759 | 1.83E-10 | 1.29E-09 |
| <i>C4B</i>      | -1.06417 | 1.92E-10 | 1.34E-09 |

|                 |          |          |          |
|-----------------|----------|----------|----------|
| <i>EFNA5</i>    | -0.335   | 1.99E-10 | 1.38E-09 |
| <i>PSMB7</i>    | -0.24736 | 4.31E-10 | 2.97E-09 |
| <i>CASP1</i>    | 0.265283 | 4.87E-10 | 3.34E-09 |
| <i>RAD21</i>    | -0.31638 | 5.13E-10 | 3.50E-09 |
| <i>GAS1</i>     | -0.65513 | 5.79E-10 | 3.92E-09 |
| <i>NDUFA13</i>  | -0.28905 | 6.25E-10 | 4.21E-09 |
| <i>ITGB8</i>    | -0.2806  | 6.94E-10 | 4.64E-09 |
| <i>SLC11A1</i>  | 0.427407 | 7.85E-10 | 5.21E-09 |
| <i>PRDX5</i>    | -0.25925 | 9.99E-10 | 6.59E-09 |
| <i>IL4R</i>     | 0.251814 | 1.08E-09 | 7.11E-09 |
| <i>PLOD2</i>    | -0.70081 | 1.12E-09 | 7.28E-09 |
| <i>COL3A1</i>   | 0.701836 | 1.14E-09 | 7.39E-09 |
| <i>RIPK3</i>    | 0.266629 | 2.36E-09 | 1.52E-08 |
| <i>FLT1</i>     | 0.396788 | 2.53E-09 | 1.62E-08 |
| <i>WT1</i>      | -0.44074 | 3.42E-09 | 2.18E-08 |
| <i>TFRC</i>     | -0.28427 | 4.96E-09 | 3.06E-08 |
| <i>YTHDF2</i>   | -0.16356 | 4.89E-09 | 3.06E-08 |
| <i>CTSH</i>     | 0.330647 | 4.96E-09 | 3.06E-08 |
| <i>UBA7</i>     | 0.187126 | 4.95E-09 | 3.06E-08 |
| <i>FLNB</i>     | -0.38822 | 4.90E-09 | 3.06E-08 |
| <i>CKLF</i>     | 0.262008 | 5.33E-09 | 3.27E-08 |
| <i>TYMP</i>     | 0.332809 | 5.73E-09 | 3.49E-08 |
| <i>EIF4EBP1</i> | -0.27219 | 5.91E-09 | 3.59E-08 |
| <i>CDH3</i>     | -0.31618 | 7.12E-09 | 4.27E-08 |
| <i>IL2RB</i>    | 0.352129 | 7.10E-09 | 4.27E-08 |
| <i>NECTIN2</i>  | -0.38641 | 7.18E-09 | 4.28E-08 |
| <i>HLA-DRB5</i> | 0.363444 | 7.36E-09 | 4.36E-08 |
| <i>IL2RA</i>    | 0.381626 | 7.67E-09 | 4.52E-08 |
| <i>HSPA6</i>    | 0.565313 | 9.66E-09 | 5.66E-08 |
| <i>TUBB</i>     | -0.35813 | 1.13E-08 | 6.56E-08 |
| <i>TLR7</i>     | 0.288431 | 1.22E-08 | 7.04E-08 |
| <i>NDUFS8</i>   | -0.19761 | 1.23E-08 | 7.12E-08 |
| <i>PIK3CD</i>   | 0.230218 | 1.26E-08 | 7.22E-08 |
| <i>VCAN</i>     | 0.697927 | 1.28E-08 | 7.31E-08 |
| <i>APLNR</i>    | 0.36643  | 1.37E-08 | 7.80E-08 |
| <i>CLU</i>      | -0.78652 | 1.46E-08 | 8.25E-08 |
| <i>REL</i>      | 0.251698 | 1.62E-08 | 9.11E-08 |
| <i>CX3CR1</i>   | 0.388757 | 1.77E-08 | 9.86E-08 |
| <i>C1R</i>      | -0.53685 | 1.81E-08 | 1.00E-07 |
| <i>TNFRSF1A</i> | -0.22162 | 2.18E-08 | 1.21E-07 |
| <i>ANXA1</i>    | -0.31659 | 2.26E-08 | 1.24E-07 |
| <i>C2</i>       | 0.321669 | 2.38E-08 | 1.30E-07 |
| <i>TPR</i>      | -0.18579 | 2.41E-08 | 1.31E-07 |
| <i>ETS1</i>     | 0.282293 | 2.64E-08 | 1.43E-07 |

|                  |          |          |          |
|------------------|----------|----------|----------|
| <i>MIF</i>       | -0.46874 | 3.22E-08 | 1.73E-07 |
| <i>WEE1</i>      | -0.2488  | 3.29E-08 | 1.76E-07 |
| <i>CDK6</i>      | -0.40995 | 3.33E-08 | 1.77E-07 |
| <i>CSF2RB</i>    | 0.296112 | 3.54E-08 | 1.88E-07 |
| <i>PUM1</i>      | -0.16164 | 3.65E-08 | 1.92E-07 |
| <i>VCAM1</i>     | 0.364302 | 3.75E-08 | 1.97E-07 |
| <i>APP</i>       | -0.47894 | 3.96E-08 | 2.07E-07 |
| <i>IL1R1</i>     | 0.30458  | 4.05E-08 | 2.11E-07 |
| <i>IL17RA</i>    | 0.25974  | 4.09E-08 | 2.11E-07 |
| <i>COL1A2</i>    | 0.696975 | 4.26E-08 | 2.19E-07 |
| <i>PPP2R1A</i>   | -0.2099  | 4.70E-08 | 2.40E-07 |
| <i>KRT5</i>      | -0.5501  | 4.70E-08 | 2.40E-07 |
| <i>CD46</i>      | -0.19077 | 4.86E-08 | 2.46E-07 |
| <i>LIF</i>       | -0.32591 | 5.21E-08 | 2.63E-07 |
| <i>SOD1</i>      | -0.25243 | 6.05E-08 | 3.03E-07 |
| <i>PRKCD</i>     | 0.229021 | 6.69E-08 | 3.34E-07 |
| <i>TRBC1/2</i>   | 0.511916 | 6.99E-08 | 3.48E-07 |
| <i>GTF3C1</i>    | -0.19009 | 7.13E-08 | 3.53E-07 |
| <i>PVR</i>       | -0.16102 | 8.92E-08 | 4.39E-07 |
| <i>IL2RG</i>     | 0.310916 | 9.44E-08 | 4.63E-07 |
| <i>TNFRSF10B</i> | -0.18898 | 1.02E-07 | 4.98E-07 |
| <i>S100A8</i>    | 0.454512 | 1.04E-07 | 5.04E-07 |
| <i>ARNT2</i>     | -0.1669  | 1.09E-07 | 5.25E-07 |
| <i>SERINC3</i>   | -0.16412 | 1.13E-07 | 5.43E-07 |
| <i>TDO2</i>      | 0.392132 | 1.23E-07 | 5.90E-07 |
| <i>DSC3</i>      | -0.282   | 1.34E-07 | 6.39E-07 |
| <i>BMP4</i>      | -0.39217 | 1.51E-07 | 7.19E-07 |
| <i>ANGPT2</i>    | 0.31458  | 1.79E-07 | 8.46E-07 |
| <i>TMEM140</i>   | 0.248305 | 1.80E-07 | 8.46E-07 |
| <i>ZEB1</i>      | 0.200254 | 1.89E-07 | 8.84E-07 |
| <i>ALCAM</i>     | -0.39151 | 2.09E-07 | 9.73E-07 |
| <i>NUMBL</i>     | -0.16337 | 2.21E-07 | 1.03E-06 |
| <i>API5</i>      | -0.12228 | 2.22E-07 | 1.03E-06 |
| <i>CD86</i>      | 0.30355  | 2.44E-07 | 1.12E-06 |
| <i>STING1</i>    | 0.180534 | 2.57E-07 | 1.18E-06 |
| <i>IDH2</i>      | 0.189383 | 2.61E-07 | 1.19E-06 |
| <i>NKG7</i>      | 0.297218 | 2.64E-07 | 1.20E-06 |
| <i>RUNX3</i>     | 0.272315 | 2.69E-07 | 1.22E-06 |
| <i>CCL4</i>      | 0.384282 | 2.71E-07 | 1.22E-06 |
| <i>IL21R</i>     | 0.274438 | 2.85E-07 | 1.28E-06 |
| <i>CXCR4</i>     | 0.48438  | 2.86E-07 | 1.28E-06 |
| <i>B2M</i>       | 0.500592 | 3.26E-07 | 1.45E-06 |
| <i>MCM7</i>      | -0.21009 | 3.82E-07 | 1.69E-06 |
| <i>NDUFB10</i>   | -0.1336  | 4.10E-07 | 1.80E-06 |

|                  |          |          |          |
|------------------|----------|----------|----------|
| <i>MST1R</i>     | -0.26646 | 4.11E-07 | 1.80E-06 |
| <i>MCM4</i>      | -0.18048 | 4.37E-07 | 1.91E-06 |
| <i>PHGDH</i>     | -0.22985 | 4.49E-07 | 1.96E-06 |
| <i>NDUFA7</i>    | -0.15002 | 4.66E-07 | 2.02E-06 |
| <i>MAP3K1</i>    | 0.210306 | 4.77E-07 | 2.06E-06 |
| <i>FGFR1</i>     | -0.34085 | 5.20E-07 | 2.22E-06 |
| <i>GRB2</i>      | 0.153812 | 5.18E-07 | 2.22E-06 |
| <i>U2AF1</i>     | -0.18533 | 5.17E-07 | 2.22E-06 |
| <i>CCND2</i>     | 0.235942 | 5.47E-07 | 2.32E-06 |
| <i>TNFRSF12A</i> | -0.3182  | 5.80E-07 | 2.45E-06 |
| <i>MAPKAPK2</i>  | 0.119412 | 6.81E-07 | 2.87E-06 |
| <i>FOXC1</i>     | -0.15093 | 7.64E-07 | 3.21E-06 |
| <i>TGFB2</i>     | -0.53426 | 8.41E-07 | 3.51E-06 |
| <i>CACNB3</i>    | -0.19906 | 1.07E-06 | 4.47E-06 |
| <i>CCL5</i>      | 0.374775 | 1.12E-06 | 4.65E-06 |
| <i>COL1A1</i>    | 0.522294 | 1.16E-06 | 4.79E-06 |
| <i>CD83</i>      | 0.266168 | 1.27E-06 | 5.22E-06 |
| <i>TOP2A</i>     | -0.28209 | 1.27E-06 | 5.22E-06 |
| <i>FLNA</i>      | -0.33762 | 1.35E-06 | 5.52E-06 |
| <i>CD200</i>     | -0.29852 | 1.59E-06 | 6.48E-06 |
| <i>CD48</i>      | 0.279232 | 1.69E-06 | 6.85E-06 |
| <i>C1QBP</i>     | -0.15096 | 1.71E-06 | 6.92E-06 |
| <i>ASNS</i>      | -0.17428 | 1.75E-06 | 7.04E-06 |
| <i>BCL2</i>      | 0.237863 | 1.83E-06 | 7.33E-06 |
| <i>LY96</i>      | 0.209723 | 1.87E-06 | 7.45E-06 |
| <i>STMN1</i>     | -0.17921 | 1.92E-06 | 7.63E-06 |
| <i>PFKFB3</i>    | 0.291719 | 2.03E-06 | 8.02E-06 |
| <i>ANLN</i>      | -0.21701 | 2.05E-06 | 8.07E-06 |
| <i>CD2</i>       | 0.308778 | 2.06E-06 | 8.09E-06 |
| <i>SOS2</i>      | 0.178564 | 2.21E-06 | 8.65E-06 |
| <i>NDUFA11</i>   | -0.1866  | 2.50E-06 | 9.75E-06 |
| <i>MFNG</i>      | 0.221843 | 2.51E-06 | 9.76E-06 |
| <i>NOTCH3</i>    | 0.608585 | 2.67E-06 | 1.03E-05 |
| <i>JAM3</i>      | 0.186697 | 2.92E-06 | 1.12E-05 |
| <i>PDGFC</i>     | -0.21076 | 3.08E-06 | 1.18E-05 |
| <i>COX6B1</i>    | -0.19385 | 3.16E-06 | 1.21E-05 |
| <i>CCNB1</i>     | -0.17625 | 3.33E-06 | 1.27E-05 |
| <i>TNFRSF14</i>  | 0.202535 | 3.34E-06 | 1.27E-05 |
| <i>JAK2</i>      | 0.213609 | 3.38E-06 | 1.28E-05 |
| <i>NLRC5</i>     | 0.199798 | 3.75E-06 | 1.41E-05 |
| <i>STAT3</i>     | -0.20977 | 3.91E-06 | 1.47E-05 |
| <i>KRT7</i>      | -0.60898 | 4.43E-06 | 1.66E-05 |
| <i>DIPK2B</i>    | 0.285108 | 4.46E-06 | 1.67E-05 |
| <i>CTSW</i>      | 0.231756 | 4.58E-06 | 1.70E-05 |

|                  |          |          |          |
|------------------|----------|----------|----------|
| <i>NDUFA1</i>    | -0.14164 | 4.63E-06 | 1.71E-05 |
| <i>AKT2</i>      | -0.17932 | 4.64E-06 | 1.71E-05 |
| <i>ICAM1</i>     | -0.42725 | 4.73E-06 | 1.74E-05 |
| <i>DAB2</i>      | 0.242201 | 4.92E-06 | 1.80E-05 |
| <i>CACNA1C</i>   | 0.1928   | 5.22E-06 | 1.91E-05 |
| <i>EGR2</i>      | 0.259918 | 5.49E-06 | 2.00E-05 |
| <i>LEF1</i>      | 0.28207  | 5.72E-06 | 2.08E-05 |
| <i>RPL23</i>     | -0.31226 | 6.38E-06 | 2.31E-05 |
| <i>SPRY4</i>     | 0.291263 | 6.55E-06 | 2.36E-05 |
| <i>CCR5</i>      | 0.259639 | 7.35E-06 | 2.63E-05 |
| <i>PTEN</i>      | 0.146787 | 7.35E-06 | 2.63E-05 |
| <i>SERINC1</i>   | -0.15039 | 7.45E-06 | 2.66E-05 |
| <i>NFATC2</i>    | 0.215583 | 7.88E-06 | 2.77E-05 |
| <i>PDGFB</i>     | 0.25864  | 7.83E-06 | 2.77E-05 |
| <i>SRSF2</i>     | -0.15429 | 7.88E-06 | 2.77E-05 |
| <i>SMPD3</i>     | -0.38924 | 8.91E-06 | 3.13E-05 |
| <i>BST2</i>      | -0.21442 | 9.09E-06 | 3.18E-05 |
| <i>MDM2</i>      | -0.24947 | 9.58E-06 | 3.34E-05 |
| <i>NUP107</i>    | -0.1353  | 1.07E-05 | 3.72E-05 |
| <i>HACD2</i>     | -0.20391 | 1.12E-05 | 3.89E-05 |
| <i>LDHB</i>      | -0.2416  | 1.17E-05 | 4.02E-05 |
| <i>TET2</i>      | 0.186442 | 1.17E-05 | 4.03E-05 |
| <i>MSH6</i>      | -0.14141 | 1.42E-05 | 4.87E-05 |
| <i>NFKB1</i>     | 0.128765 | 1.43E-05 | 4.88E-05 |
| <i>GOT2</i>      | -0.10587 | 1.45E-05 | 4.93E-05 |
| <i>CBL</i>       | 0.125182 | 1.47E-05 | 4.98E-05 |
| <i>PIK3R1</i>    | 0.203527 | 1.59E-05 | 5.37E-05 |
| <i>HHEX</i>      | 0.26263  | 1.59E-05 | 5.37E-05 |
| <i>ITGA6</i>     | -0.13097 | 1.63E-05 | 5.49E-05 |
| <i>PCNA</i>      | -0.1613  | 1.71E-05 | 5.72E-05 |
| <i>CD8A</i>      | 0.250672 | 1.75E-05 | 5.84E-05 |
| <i>ITCH</i>      | -0.13407 | 1.79E-05 | 5.96E-05 |
| <i>CD209</i>     | 0.252672 | 1.99E-05 | 6.59E-05 |
| <i>TPSAB1/B2</i> | 0.38302  | 1.99E-05 | 6.59E-05 |
| <i>RUNX1T1</i>   | 0.190874 | 2.18E-05 | 7.18E-05 |
| <i>CD3E</i>      | 0.260486 | 2.42E-05 | 7.95E-05 |
| <i>NPM1</i>      | -0.18002 | 2.50E-05 | 8.18E-05 |
| <i>CD55</i>      | -0.20828 | 2.63E-05 | 8.60E-05 |
| <i>HAMP</i>      | 0.239318 | 2.76E-05 | 9.00E-05 |
| <i>OAS1</i>      | 0.211716 | 3.14E-05 | 0.000102 |
| <i>HLA-E</i>     | 0.245115 | 3.14E-05 | 0.000102 |
| <i>PLA2G2A</i>   | -0.46703 | 3.20E-05 | 0.000103 |
| <i>SNAI2</i>     | 0.243039 | 3.29E-05 | 0.000106 |
| <i>NDUFB4</i>    | -0.13125 | 3.49E-05 | 0.000111 |

|                |          |          |          |
|----------------|----------|----------|----------|
| <i>PPP2CB</i>  | -0.14036 | 3.47E-05 | 0.000111 |
| <i>WNT2B</i>   | -0.37588 | 3.48E-05 | 0.000111 |
| <i>NR3C1</i>   | 0.188621 | 3.68E-05 | 0.000117 |
| <i>BRD4</i>    | -0.17265 | 4.13E-05 | 0.000131 |
| <i>KEAP1</i>   | -0.11171 | 4.28E-05 | 0.000135 |
| <i>COMP</i>    | 0.374406 | 4.39E-05 | 0.000138 |
| <i>CD40</i>    | 0.222637 | 4.62E-05 | 0.000145 |
| <i>MYD88</i>   | 0.13885  | 5.30E-05 | 0.000165 |
| <i>ANKRD28</i> | -0.16156 | 5.67E-05 | 0.000177 |
| <i>JAK1</i>    | 0.100802 | 5.96E-05 | 0.000185 |
| <i>CDC25B</i>  | -0.18305 | 5.98E-05 | 0.000185 |
| <i>ADAM12</i>  | 0.242638 | 6.27E-05 | 0.000193 |
| <i>RAC1</i>    | -0.18362 | 6.36E-05 | 0.000196 |
| <i>MMP9</i>    | 0.724119 | 6.82E-05 | 0.000209 |
| <i>TAPBP</i>   | -0.10024 | 6.86E-05 | 0.00021  |
| <i>POLR2A</i>  | -0.11134 | 6.95E-05 | 0.000212 |
| <i>TNFAIP6</i> | 0.253332 | 6.98E-05 | 0.000212 |
| <i>IL18</i>    | -0.32705 | 7.16E-05 | 0.000217 |
| <i>PEBP1</i>   | -0.20799 | 7.19E-05 | 0.000217 |
| <i>IDH1</i>    | 0.176883 | 7.59E-05 | 0.000228 |
| <i>FAP</i>     | 0.343616 | 7.65E-05 | 0.000229 |
| <i>PDGFRA</i>  | 0.28783  | 7.81E-05 | 0.000233 |
| <i>GBP4</i>    | 0.227959 | 7.81E-05 | 0.000233 |
| <i>GZMK</i>    | 0.235027 | 8.27E-05 | 0.000245 |
| <i>FUBP1</i>   | -0.12178 | 8.28E-05 | 0.000245 |
| <i>MAP3K5</i>  | 0.165559 | 8.88E-05 | 0.000262 |
| <i>COL4A5</i>  | -0.23072 | 9.14E-05 | 0.000269 |
| <i>ETV1</i>    | 0.248098 | 9.25E-05 | 0.000272 |
| <i>LFNG</i>    | 0.259102 | 9.31E-05 | 0.000272 |
| <i>TGFB1</i>   | 0.340819 | 9.30E-05 | 0.000272 |
| <i>OAS2</i>    | 0.214342 | 9.58E-05 | 0.000279 |
| <i>RGMB</i>    | 0.202039 | 0.00011  | 0.000318 |
| <i>COX5B</i>   | -0.14175 | 0.000111 | 0.000322 |
| <i>CDK4</i>    | -0.14288 | 0.000113 | 0.000328 |
| <i>MAP3K20</i> | -0.12536 | 0.000114 | 0.000328 |
| <i>FGF18</i>   | -0.20341 | 0.000122 | 0.00035  |
| <i>IL1RAP</i>  | -0.15984 | 0.000127 | 0.000363 |
| <i>SAA1</i>    | -0.59426 | 0.000146 | 0.000415 |
| <i>RSAD2</i>   | 0.218193 | 0.000163 | 0.000463 |
| <i>DEPTOR</i>  | 0.217998 | 0.000165 | 0.000465 |
| <i>BRD2</i>    | -0.13031 | 0.000167 | 0.00047  |
| <i>POLR2H</i>  | -0.11692 | 0.000177 | 0.000498 |
| <i>MAP3K7</i>  | -0.10499 | 0.000197 | 0.000551 |
| <i>PRKAR1B</i> | -0.17233 | 0.000199 | 0.000556 |

|                 |          |          |          |
|-----------------|----------|----------|----------|
| <i>HDAC2</i>    | -0.13048 | 0.000206 | 0.000573 |
| <i>UBC</i>      | -0.2545  | 0.000212 | 0.000589 |
| <i>SERPINA1</i> | 0.862852 | 0.000234 | 0.000644 |
| <i>H2AX</i>     | -0.15175 | 0.00024  | 0.000657 |
| <i>MYC</i>      | -0.25349 | 0.000241 | 0.000658 |
| <i>NFATC3</i>   | 0.113825 | 0.000248 | 0.000676 |
| <i>EWSR1</i>    | -0.12099 | 0.000251 | 0.000682 |
| <i>CACNA2D1</i> | 0.171247 | 0.000272 | 0.000736 |
| <i>RPL7A</i>    | -0.28209 | 0.000275 | 0.000743 |
| <i>CXCL10</i>   | 0.265214 | 0.000295 | 0.000796 |
| <i>CD47</i>     | -0.18051 | 0.0003   | 0.000808 |
| <i>CCND1</i>    | -0.25319 | 0.000319 | 0.000856 |
| <i>SDHA</i>     | -0.12011 | 0.000332 | 0.000889 |
| <i>MAP2K2</i>   | -0.1251  | 0.000343 | 0.000915 |
| <i>SELL</i>     | 0.205723 | 0.000348 | 0.000927 |
| <i>IRS1</i>     | 0.213385 | 0.000373 | 0.000989 |
| <i>ANP32B</i>   | -0.13502 | 0.000373 | 0.000989 |
| <i>CD58</i>     | 0.259111 | 0.000419 | 0.001106 |
| <i>BAD</i>      | -0.11784 | 0.000429 | 0.001128 |
| <i>CD69</i>     | 0.2443   | 0.000457 | 0.001198 |
| <i>CENPF</i>    | -0.16383 | 0.000486 | 0.00127  |
| <i>GNA11</i>    | -0.10326 | 0.00049  | 0.001279 |
| <i>CLEC5A</i>   | 0.238186 | 0.000496 | 0.001291 |
| <i>AXIN1</i>    | -0.11956 | 0.000499 | 0.001296 |
| <i>CFD</i>      | 0.266642 | 0.000507 | 0.001312 |
| <i>CASP7</i>    | 0.11293  | 0.000525 | 0.001356 |
| <i>HDAC1</i>    | 0.120881 | 0.000528 | 0.00136  |
| <i>HLA-DOB</i>  | 0.195557 | 0.000574 | 0.001472 |
| <i>MAPK3</i>    | 0.110951 | 0.000607 | 0.001549 |
| <i>LTBR</i>     | -0.11969 | 0.000621 | 0.001581 |
| <i>TBL1XR1</i>  | -0.1734  | 0.00067  | 0.001698 |
| <i>XCL1/2</i>   | 0.172636 | 0.000678 | 0.001713 |
| <i>SLAMF6</i>   | 0.179089 | 0.000707 | 0.001775 |
| <i>NSD2</i>     | -0.10227 | 0.000707 | 0.001775 |
| <i>TAP1</i>     | -0.22032 | 0.000707 | 0.001775 |
| <i>MMP11</i>    | 0.318985 | 0.000725 | 0.001814 |
| <i>LTBP1</i>    | 0.307898 | 0.000737 | 0.00184  |
| <i>IL15RA</i>   | 0.165277 | 0.000742 | 0.001845 |
| <i>IL6ST</i>    | -0.14738 | 0.000769 | 0.001901 |
| <i>RORA</i>     | 0.192663 | 0.000767 | 0.001901 |
| <i>SPP1</i>     | 0.792038 | 0.000784 | 0.001931 |
| <i>ALDOA</i>    | -0.345   | 0.000813 | 0.001998 |
| <i>C3</i>       | -0.67478 | 0.000851 | 0.002081 |
| <i>BRD3</i>     | -0.1233  | 0.00088  | 0.002141 |



|                  |          |          |          |
|------------------|----------|----------|----------|
| <i>DDIT4</i>     | 0.257404 | 0.000936 | 0.002268 |
| <i>H3C2</i>      | -0.24714 | 0.000936 | 0.002268 |
| <i>PDPN</i>      | -0.28983 | 0.001016 | 0.002454 |
| <i>P2RY13</i>    | 0.184421 | 0.001021 | 0.002454 |
| <i>CGAS</i>      | 0.135387 | 0.001019 | 0.002454 |
| <i>IRAK4</i>     | 0.127968 | 0.001022 | 0.002454 |
| <i>NOS3</i>      | 0.217324 | 0.001051 | 0.002517 |
| <i>CXCL13</i>    | 0.249667 | 0.001099 | 0.002627 |
| <i>IGF1</i>      | 0.19683  | 0.001107 | 0.002639 |
| <i>MARCO</i>     | 0.264531 | 0.001141 | 0.002708 |
| <i>JAG2</i>      | 0.138787 | 0.001171 | 0.002773 |
| <i>HHIP</i>      | -0.27057 | 0.001217 | 0.00287  |
| <i>NOTCH1</i>    | 0.178353 | 0.001217 | 0.00287  |
| <i>NFATC4</i>    | 0.182321 | 0.001273 | 0.002993 |
| <i>POU2AF1</i>   | 0.201652 | 0.00128  | 0.003004 |
| <i>JUP</i>       | -0.10514 | 0.001325 | 0.003096 |
| <i>IER3</i>      | 0.196505 | 0.001332 | 0.003106 |
| <i>FZD4</i>      | 0.256904 | 0.001392 | 0.003238 |
| <i>SOCS1</i>     | 0.179492 | 0.001405 | 0.003251 |
| <i>CXCL9</i>     | 0.327471 | 0.001404 | 0.003251 |
| <i>ERCC2</i>     | -0.1179  | 0.001407 | 0.003251 |
| <i>TNFRSF25</i>  | 0.158444 | 0.001418 | 0.003264 |
| <i>THEM4</i>     | -0.10083 | 0.001442 | 0.00331  |
| <i>CASP10</i>    | 0.135739 | 0.001456 | 0.003335 |
| <i>STAT5B</i>    | 0.119547 | 0.001468 | 0.003356 |
| <i>HLA-DPB1</i>  | 0.201771 | 0.001504 | 0.00343  |
| <i>PRKACB</i>    | 0.156968 | 0.001545 | 0.003517 |
| <i>RUNX1</i>     | 0.136124 | 0.001757 | 0.003947 |
| <i>C4BPA</i>     | -0.26713 | 0.001762 | 0.003949 |
| <i>CDH1</i>      | -0.17699 | 0.001858 | 0.004146 |
| <i>HLA-B</i>     | 0.255971 | 0.002196 | 0.004891 |
| <i>NLRP3</i>     | 0.172477 | 0.002248 | 0.004975 |
| <i>GPI</i>       | -0.34077 | 0.002376 | 0.005248 |
| <i>TICAM2</i>    | 0.129036 | 0.002438 | 0.005373 |
| <i>SH2B2</i>     | 0.154019 | 0.002545 | 0.005584 |
| <i>TNFSF10</i>   | 0.234857 | 0.002873 | 0.006265 |
| <i>CCL18</i>     | 0.299259 | 0.002938 | 0.006381 |
| <i>CD3D</i>      | 0.213395 | 0.003027 | 0.00656  |
| <i>TNFRSF11B</i> | -0.1464  | 0.003044 | 0.006585 |
| <i>CD81</i>      | -0.2167  | 0.003083 | 0.006654 |
| <i>JAG1</i>      | 0.32479  | 0.003204 | 0.006873 |
| <i>CXCL14</i>    | 0.268334 | 0.00345  | 0.007341 |
| <i>IRAK3</i>     | 0.146043 | 0.003615 | 0.007677 |
| <i>H3-5</i>      | -0.12955 | 0.003624 | 0.00768  |

|                 |          |          |          |
|-----------------|----------|----------|----------|
| <i>NFKBIZ</i>   | -0.21072 | 0.003824 | 0.008071 |
| <i>KRT17</i>    | -0.31613 | 0.00392  | 0.008256 |
| <i>COL5A2</i>   | 0.179502 | 0.004197 | 0.008771 |
| <i>CD5</i>      | 0.169978 | 0.00425  | 0.008863 |
| <i>SFN</i>      | -0.12298 | 0.004338 | 0.009029 |
| <i>NANOG</i>    | 0.152803 | 0.00455  | 0.009415 |
| <i>CEBPB</i>    | -0.11553 | 0.004545 | 0.009415 |
| <i>RIMKLB</i>   | -0.12652 | 0.004977 | 0.010276 |
| <i>SLC2A1</i>   | -0.40295 | 0.005091 | 0.01045  |
| <i>UBE2C</i>    | -0.18387 | 0.005086 | 0.01045  |
| <i>NR4A1</i>    | 0.27166  | 0.005106 | 0.010462 |
| <i>RRAD</i>     | -0.20045 | 0.005236 | 0.010685 |
| <i>CCL2</i>     | 0.259225 | 0.00532  | 0.010773 |
| <i>ID4</i>      | -0.15452 | 0.00531  | 0.010773 |
| <i>SHC2</i>     | -0.17152 | 0.005301 | 0.010773 |
| <i>CACNG4</i>   | -0.12739 | 0.005348 | 0.01081  |
| <i>PKM</i>      | -0.16379 | 0.005628 | 0.011354 |
| <i>TNFSF13B</i> | 0.167351 | 0.005792 | 0.011662 |
| <i>CXCL2</i>    | 0.209933 | 0.005808 | 0.011672 |
| <i>BAMBI</i>    | -0.12707 | 0.005853 | 0.011739 |
| <i>L1CAM</i>    | -0.21719 | 0.006291 | 0.01257  |
| <i>CD44</i>     | -0.26016 | 0.006417 | 0.012797 |
| <i>IRAK1</i>    | -0.12534 | 0.006554 | 0.013021 |
| <i>SFRP1</i>    | 0.156669 | 0.006607 | 0.013102 |
| <i>JUNB</i>     | 0.324537 | 0.006926 | 0.013683 |
| <i>SHC1</i>     | -0.1727  | 0.007025 | 0.013851 |
| <i>BCAT1</i>    | -0.28819 | 0.007172 | 0.014115 |
| <i>PURA</i>     | 0.102511 | 0.007365 | 0.014413 |
| <i>RPS27A</i>   | -0.12045 | 0.007389 | 0.014417 |
| <i>RRAS2</i>    | -0.10199 | 0.007394 | 0.014417 |
| <i>ID2</i>      | 0.14255  | 0.007508 | 0.014611 |
| <i>MYCT1</i>    | 0.17381  | 0.00777  | 0.015095 |
| <i>ALDOC</i>    | 0.167271 | 0.008409 | 0.016305 |
| <i>IRF2</i>     | 0.102345 | 0.00877  | 0.016912 |
| <i>DDX58</i>    | 0.108227 | 0.008968 | 0.017261 |
| <i>LGR5</i>     | 0.157531 | 0.00907  | 0.017425 |
| <i>PYCARD</i>   | 0.114103 | 0.010033 | 0.019206 |
| <i>PBX1</i>     | -0.15213 | 0.010144 | 0.019383 |
| <i>TGFB3</i>    | 0.220825 | 0.010195 | 0.019446 |
| <i>ICAM3</i>    | 0.136342 | 0.010226 | 0.019469 |
| <i>PIM1</i>     | -0.15069 | 0.01038  | 0.01969  |
| <i>STC1</i>     | 0.265675 | 0.011964 | 0.022532 |
| <i>SLC25A1</i>  | -0.10283 | 0.012096 | 0.02274  |
| <i>SOD2</i>     | -0.4016  | 0.012594 | 0.023591 |

|                  |          |          |          |
|------------------|----------|----------|----------|
| <i>CDKN1A</i>    | -0.16661 | 0.01296  | 0.024148 |
| <i>HK1</i>       | 0.101509 | 0.01341  | 0.024942 |
| <i>HDAC5</i>     | 0.111649 | 0.013452 | 0.024976 |
| <i>FZD7</i>      | 0.124073 | 0.013664 | 0.025325 |
| <i>DKK1</i>      | -0.15628 | 0.015131 | 0.027895 |
| <i>CYLD</i>      | 0.103731 | 0.015321 | 0.028123 |
| <i>CCL15</i>     | 0.189022 | 0.015377 | 0.02815  |
| <i>H3-3A</i>     | -0.12643 | 0.015479 | 0.028288 |
| <i>NGFR</i>      | 0.156817 | 0.015953 | 0.029053 |
| <i>BIRC5</i>     | -0.10207 | 0.016434 | 0.029774 |
| <i>SETBP1</i>    | 0.142547 | 0.016758 | 0.030309 |
| <i>SLAMF7</i>    | 0.12887  | 0.017174 | 0.031007 |
| <i>IL34</i>      | 0.165402 | 0.018516 | 0.033146 |
| <i>CDC20</i>     | -0.10918 | 0.018818 | 0.033514 |
| <i>IL12RB1</i>   | 0.160397 | 0.019958 | 0.035424 |
| <i>H3C8</i>      | -0.14695 | 0.020192 | 0.035779 |
| <i>TGFBR1</i>    | 0.10573  | 0.020379 | 0.03605  |
| <i>TPM1</i>      | -0.18294 | 0.020955 | 0.036944 |
| <i>IL7R</i>      | 0.154988 | 0.021166 | 0.037192 |
| <i>TYMS</i>      | -0.11276 | 0.022607 | 0.039591 |
| <i>DUSP1</i>     | -0.32255 | 0.023017 | 0.040242 |
| <i>CFI</i>       | -0.22507 | 0.023608 | 0.041206 |
| <i>PDCD1LG2</i>  | 0.123873 | 0.023718 | 0.041329 |
| <i>IL33</i>      | 0.196439 | 0.023866 | 0.041517 |
| <i>FUT8</i>      | 0.120268 | 0.024989 | 0.043328 |
| <i>ADH1A/B/C</i> | 0.301462 | 0.025147 | 0.04353  |
| <i>TNF</i>       | 0.143829 | 0.025267 | 0.043666 |
| <i>SERPING1</i>  | -0.2771  | 0.026855 | 0.046107 |
| <i>SBNO2</i>     | -0.12616 | 0.027813 | 0.047517 |
| <i>AXL</i>       | -0.20523 | 0.028244 | 0.04788  |
| <i>CCND3</i>     | 0.114919 | 0.028589 | 0.048292 |
| <i>EGR1</i>      | 0.320636 | 0.029332 | 0.049388 |

Supplementary Table 6: list of GO categories (tS-AOIs vs tE-AOIs)

|                                                    | GO-BIOLOGICAL PROCESS                                     | FRACTION OF GENES | ADJUSTED PVALUE |
|----------------------------------------------------|-----------------------------------------------------------|-------------------|-----------------|
| <b>GENES UP IN tS vs tE</b>                        | Cytokine-Mediated Signaling Pathway                       | 52/257            | 9.20E-43        |
|                                                    | Inflammatory Response                                     | 47/236            | 2.59E-38        |
|                                                    | Regulation Of T Cell Activation                           | 20/62             | 2.02E-21        |
|                                                    | Regulation Of Cell Migration                              | 35/434            | 1.69E-15        |
|                                                    | Positive Regulation Of DNA-templated Transcription        | 60/1243           | 3.18E-15        |
|                                                    | Positive Regulation Of Transcription By RNA Polymerase II | 44/938            | 6.52E-11        |
|                                                    | Regulation Of Angiogenesis                                | 18/205            | 3.92E-09        |
|                                                    | Cell-Matrix Adhesion                                      | 12/109            | 1.37E-07        |
|                                                    | Extracellular Matrix Organization                         | 12/176            | 2.16E-05        |
| <b>GENES DOWN IN tS vs tE</b>                      | Regulation Of Apoptotic Process                           | 42/705            | 6.57E-16        |
|                                                    | Regulation Of Programmed Cell Death                       | 31/381            | 4.26E-15        |
|                                                    | Regulation Of Cell Population Proliferation               | 39/766            | 4.93E-13        |
|                                                    | Regulation Of Mitotic Cell Cycle Phase Transition         | 11/63             | 3.55E-06        |
|                                                    | Regulation Of Epithelial Cell Proliferation               | 10/91             | 6.22E-06        |
|                                                    | Mitochondrial ATP Synthesis Coupled Electron Transport    | 9/70              | 6.71E-06        |
|                                                    | Regulation Of Mitotic Cell Cycle                          | 10/125            | 6.25E-05        |
|                                                    | Epidermal Cell Differentiation                            | 6/54              | 7.47E-04        |
|                                                    | Regulation Of Cell Adhesion Mediated By Integrin          | 5/33              | 7.57E-04        |
| Regulation Of Epithelial To Mesenchymal Transition | 5/83                                                      | 0.018             |                 |

Supplementary Table 7: immunity related genes (Chord Plot)

| CATEGORIES                  | GENES                                                                                                                                                                                                                                                                                                                     |
|-----------------------------|---------------------------------------------------------------------------------------------------------------------------------------------------------------------------------------------------------------------------------------------------------------------------------------------------------------------------|
| <b>ADAPTIVE IMMUNITY</b>    | CCL4, CCL5, CCR5, CD2, CD37, CD3D, CD3E, CD4, CD40, CD69, CD8A, GIMAP6, GZMK, IL2RA, IL2RB, IL2RG, IL32, IL4R, JAM3, PRDM1, PTPRC, SLAMF6, TGFB1, TNFRSF25, TRAC                                                                                                                                                          |
| <b>ANTIGEN PRESENTATION</b> | CD74, CD83, CTSS, HAMP, HLA-DMA, HLA-DMB, HLA-DOA, HLA-DOB, HLA-DPA1, HLA-DPB1, HLA-DQA1, HLA-DQB1, HLA-DRA, HLA-DRB, HLA-DRB3, HLA-DRB4, HLA-DRB5, ITGAX, TLR7, TREM2                                                                                                                                                    |
| <b>INFLAMMATION</b>         | B2M, C5AR1, CCL15, CCL2, CD163, CD209, CD58, CLEC5A, CSF3R, CXCL10, CXCL12, CXCL13, CXCL14, CXCL16, CXCL2, CXCL9, FCGR1A, FCGR2, HCK, IDH1, IFNGR2, IL17RA, INPP5D, ITGB2, JAK3, LCP1, LILRB2, LYN, LYZ, MAP3K1, MS4A4A, MS4A6A, NFATC2, PIK3CD, RAC2, S100A8, S100A9, SLC11A1, SYK, TLR1, TLR2, TNFRSF1B, VCAN           |
| <b>INNATE IMMUNITY</b>      | CD14, CD48, CD53, CD68, CD84, CKLF, CLEC7A, CSF1R, CSF2RB, CX3CR1, CYBB, FCER1G, FPR1, FPR3, GMIP, HLA-E, HSPA6, IL1R1, ITGAL, JAML, LAIR1, LILRB1, LILRB4, LTBP1, LY96, MARCO, MRC1, MSR1, NCF4, NKG7, NLRP3, OAS1, OLFML2B, PRKCD, SAMSN1, SELL, SERPINA1, SIGLEC1, SOCS1, TLR4, TNFAIP6, TNFSF10, TNFSF12, UBA7, WIPF1 |
| <b>OTHER</b>                | A2M, C1QA, C1QB, C2, C3AR1, C7, CD86, F13A1, HAVCR2, LGALS9, TNFRSF14                                                                                                                                                                                                                                                     |

Supplementary Table 8: genes included in the validation panel subdivided for categories

| CATEGORIES                   | GENES                                                                                                                                                                                                                                                                                                         |
|------------------------------|---------------------------------------------------------------------------------------------------------------------------------------------------------------------------------------------------------------------------------------------------------------------------------------------------------------|
| <b>ANGIOGENESIS</b>          | ANGPT2, CXCL12, CXCR4, ENG, ETS1, FGF2, FLT1, NOS3, NRP1, PDGFA, PDGFB, PDGFC, PDGFRA, PDGFRB, PECAM1, SPRY2, TYMP, VCAM1                                                                                                                                                                                     |
| <b>INFLAMMATION/IMMUNITY</b> | ATF1, BAMBI, BMP4, CBL, CCL4, CCL5, CCR5, CD4, CD40, CD68, CD8A, CLEC5A, CSF1R, CTSS, CX3CR1, CXCL12, CXCL16, ICAM1, ID4, IFNGR2, IL10RA, IL32, IL33, IRF8, ITGAL, ITGAM, ITGAX, ITGB2, JAK2, JAK3, JAM3, LGALS3, MARCO, MAVS, MRC1, MUC1, MYD88, NDUFS7, PRDM1, S100A8, S100A9, SBNO2, SELL, SERPINA1, SMAD2 |
| <b>OXIDATIVE STRESS</b>      | ABL1, AKAP1, BNIP3, COX5B, COX6A1, COX6B1, FH, GPX4, NDUFS7, NDUFS8, PMAIP1, PRDX5, SDHA, SOD2, THEM4, UQCR11, UQCRQ                                                                                                                                                                                          |
| <b>SIGNALING</b>             | BAMBI, BMP4, CMKLR1, EGFR, ERBB2, FGF9, FGFR1, GSK3B, HHIP, IGF1, IGF1R, IRS1, JAG1, JAG2, MERTK, MET, NOTCH1, NOTCH2, NOTCH3, NR3C1, OAT, PDGFA, PDGFB, PDGFC, PDGFRA, PDGFRB, RICTOR, RPTOR, SERPINB5, TGFB1, TGFB2, TSC1                                                                                   |
| <b>STRUCTURE/EMT</b>         | CDH1, CDH2, CDH3, CDH5, DSC3, DSP, EFNA1, EFNA5, EPHA2, FAP, FLNA, FLNB, ICAM1, ITGA1, ITGA2, ITGA3, ITGA4, ITGA6, ITGAL, ITGAM, ITGAX, ITGB2, ITGB4, ITGB8, JUP, KRT10, KRT14, KRT17, KRT18, KRT19, KRT5, KRT7, L1CAM, LAMA5, LAMC2, MCAM, MMP9, PDPN, PPL, SNAI2, SPP1, STMN1, TGFB1, TGFB2, ZEB1, ZEB2     |
| <b>TRANSCRIPTION FACTORS</b> | ARNT2, ATF1, ATF2, CEBPB, E2F3, EGR1, EGR2, ELK1, EP300, ETS1, ETV1, ETV4, FOXC1, HES1, HIF1A, ID4, JUNB, LEF1, MYC, MYD88, NFATC2, NFATC4, NFKB1, PBX1, PRDM1, RORA, RUNX3, SMAD2, SMAD3, SMAD4, SMAD5, SNAI2, SREBF1, STAT3, STAT6, TCF3, VHL, WT1, ZEB1, ZEB2                                              |

OTHERS

APC, ARID1B, ARID2, ATRX, AXIN1, BAP1, BRD2, BRD3, BRD4, BRD7, CREBBP, CTSH, CTSW, DKK1, ELMO1, ERCC2, FZD1, FZD2, FZD4, FZD6, HHEX, linc00941, LRP5, MAML2, MDM2, MDM4, MED12, MEN1, MXI1, NFE2L2, NR4A1, PBRM1, PSEN1, PUM1, SBNO2, SETD2, SFRP1, SFRP2, SIN3A, SMARCA4, TET2, TNKS, WNT2B, WNT5B, TET2, TNKS, WNT2B, WNT5B
